# Supplementary material
Source: PubMed Central journal article supplement (PMC4226117)
Supplement: pnas.1416574111.sapp.pdf [file pnas.1416574111.sapp.pdf]

# Supplementary Methods. Testing phylogenetic independent origin hypotheses using Bayes factors

## Abstract

To assess support for the hypothesis that photophores originated more than once, we developed a Bayes factor test in which we compare the prior and posterior probabilities of the observed data under two opposing hypotheses (that the number of gains required is either less than or greater/equal to  $M$ ). To approximate these prior and posterior probabilities we developed a computational method which uses MCMC to account for phylogenetic uncertainty and uncertainty in rates of gain and loss. Here we describe the model assumptions and computational details, which have been implemented in the R package `indorigin` available at <https://github.com/vnminin/indorigin>.

## Modeling assumptions

We start with a binary character (e.g. absence/presence of a morphological trait) measured in  $n$  species. We collect these measurements into vector  $\mathbf{y} = (y_1, \dots, y_n)$ , where each  $y_i \in \{0, 1\}$ . Suppose that the evolutionary relationship among the above species can be described by a phylogeny  $\tau$ , which includes branch lengths. We assume that the binary character had evolved along this phylogeny according to a two-state continuous-time Markov chain (CTMC) with an infinitesimal rate matrix

$$\mathbf{\Lambda} = \begin{pmatrix} -\lambda_{01} & \lambda_{01} \\ \lambda_{10} & -\lambda_{10} \end{pmatrix}.$$

We also assume that we have another set of data  $\mathbf{x}$ , molecular and/or morphological, collected from the same species. In principle, we can set up an evolutionary model for this second data set, with evolutionary model parameters  $\boldsymbol{\theta}$  (e.g. substitution matrix, rate heterogeneity parameters) and then approximate the posterior distribution of all model parameters conditional on all available data:

$$\Pr(\tau, \boldsymbol{\theta}, \lambda_{01}, \lambda_{10} \mid \mathbf{x}, \mathbf{y}) \propto \Pr(\mathbf{x} \mid \tau, \boldsymbol{\theta})\Pr(\mathbf{y} \mid \tau, \lambda_{01}, \lambda_{10})\Pr(\tau)\Pr(\boldsymbol{\theta})\Pr(\lambda_{01})\Pr(\lambda_{10}), \quad (1)$$

where we assume that *a priori*  $\lambda_{01} \sim \text{Gamma}(\alpha_{01}, \beta_{01})$  and  $\lambda_{10} \sim \text{Gamma}(\alpha_{10}, \beta_{10})$ , with the rest of the priors left unspecified for generality. However, in practice the contribution of the data vector  $\mathbf{y}$  to phylogenetic estimation is negligible when compared to the contribution of the data matrix  $\mathbf{x}$ . Therefore, we take a two-stage approach, where we first approximate the posterior distribution

$$\Pr(\tau, \boldsymbol{\theta} \mid \mathbf{x}) \propto \Pr(\mathbf{x} \mid \tau, \boldsymbol{\theta})\Pr(\tau)\Pr(\boldsymbol{\theta})\Pr(\lambda_{01})\Pr(\lambda_{10})$$

via Markov chain Monte Carlo (MCMC). This produces the posterior sample of  $K$  phylogenies,  $\boldsymbol{\tau} = (\tau_1, \dots, \tau_K)$ . This sample can also be generated via a bootstrap procedure within the maximum likelihood analysis. Next, we form an *approximate* posterior distribution

$$\begin{aligned} \widetilde{\Pr}(\lambda_{01}, \lambda_{10} \mid \mathbf{x}, \mathbf{y}) &= \int_{\tau} \Pr(\lambda_{01}, \lambda_{10} \mid \tau, \mathbf{y})\Pr(\tau \mid \mathbf{x})d\tau \\ &\propto \int_{\tau} \Pr(\mathbf{y} \mid \tau, \lambda_{01}, \lambda_{10})\Pr(\lambda_{01})\Pr(\lambda_{10})\Pr(\tau \mid \mathbf{x})d\tau \\ &\approx \left[ \sum_{k=1}^K \Pr(\mathbf{y} \mid \tau_k, \lambda_{01}, \lambda_{10}) \right] \Pr(\lambda_{01})\Pr(\lambda_{10}). \end{aligned} \quad (2)$$

that helps us estimate the rates of gain and loss of the trait,  $\lambda_{01}$  and  $\lambda_{10}$ , appropriately accounting for phylogenetic uncertainty. The approximate posterior (2) has only two parameters and therefore can be approximated by multiple numerical procedures, including deterministic integration techniques, such as Gaussian quadrature. We implement a MCMC algorithm that targets posterior (2), but plan to experiment with deterministic integration in the future.

So far our modeling assumptions and approximations follow standard practices in statistical phylogenetics as applied to macroevolution. For example, one could use software packages BayesTraits [Pagel et al., 2004] or Mr.Bayes [Ronquist et al., 2012], among many others, to approximate the posterior distributions (1) or (2). The main novelty of our methodology, explained in the next section, comes from the way we use these posteriors to devise a principled method for testing hypotheses about the number of gains and losses of the trait of interest.

## Hypotheses and their Bayes factors

Let  $N_{01}$  be the number of gains and let  $N_{10}$  be the number of losses. Conservatively, in this work we assume that the root of the phylogenetic tree relating the species under study is in state 1. This means that the parsimony score for the number of gains associated with vector  $\mathbf{y}$  and *any* phylogeny is 0, because under our assumption about the root any binary vector can be generated with only trait losses, even though such an evolutionary trajectory may be very unlikely.

We fix a nonnegative threshold  $m$  and formulate an *independent origin hypothesis* associated with this threshold as

$$H_0 : N_{01} \leq M,$$

with the corresponding alternative

$$H_a : N_{01} > M.$$

This means that our null hypothesis is that the trait was gained at most  $M + 1$  times — we add one because we know that the trait was gained at least once. For example, using  $M = 0$  corresponds to testing the null hypothesis that the trait was gained only once some time prior to the time of the most recent common ancestor of the species under study. We use a Bayes factor test [Kass and Raftery, 1995] to compare the above two hypotheses:

$$\text{BF}_M = \frac{\Pr(\mathbf{y} \mid N_{01} \leq M)}{\Pr(\mathbf{y} \mid N_{01} > M)} = \frac{\Pr(N_{01} \leq M \mid \mathbf{y})/\Pr(N_{01} \leq M)}{\Pr(N_{01} > M \mid \mathbf{y})/\Pr(N_{01} > M)}, \quad (3)$$

where  $\Pr(N_{01} \leq M \mid \mathbf{y})$  and  $\Pr(N_{01} > M \mid \mathbf{y})$  are the posterior probabilities of the null and alternative hypotheses, and  $\Pr(N_{01} \leq M)$  and  $\Pr(N_{01} > M)$  are the corresponding prior probabilities. We explain how we compute these probabilities in the next section.

## Computational details

We approximate the posterior (2) by a MCMC algorithm that starts with arbitrary initial values  $\lambda_{01}^{(0)}$ ,  $\lambda_{10}^{(0)}$  and at each iteration  $l \geq 1$  repeats the following steps:

1. Sample uniformly at random a tree index  $k$  from the set  $\{1, \dots, K\}$  and set the current tree  $\tau^{(l)} = \tau_k$ .

2. Conditional on the phylogeny and the gain and loss rates from the previous iteration, draw a realization of the full evolutionary trajectory (also known as stochastic mapping [Nielsen, 2002]) on phylogeny  $\tau^{(l)}$  using the uniformization method [Lartillot, 2006] and record the following missing data summaries:  $N_{01}^{(l)}$ ,  $N_{10}^{(l)}$ , defined as before, and  $t_0^{(l)}$ ,  $t_1^{(l)}$  — total times the trait spent in state 0 and 1 respectively.
3. Draw new values of gain and loss rates from their full conditionals:

$$\begin{aligned}\lambda_{01}^{(l)} &\sim \text{Gamma}(N_{01}^{(l)} + \alpha_{01}, t_0^{(l)} + \beta_{01}), \\ \lambda_{10}^{(l)} &\sim \text{Gamma}(N_{10}^{(l)} + \alpha_{10}, t_1^{(l)} + \beta_{10}).\end{aligned}$$

Advantages of using the above Gibbs sampling algorithm are: a) no tuning is required and b) augmenting the state space with latent variables,  $N_{01}$ ,  $N_{10}$ ,  $t_0$ ,  $t_1$ , and sampling these latent variables efficiently yield rapid convergence of the MCMC, in our experience.

The last important computational issue is computing prior and posterior probabilities needed to compute the Bayes factor (3). Consider computing the posterior probability  $\Pr(N_{01} \leq M \mid \mathbf{y})$  — a surprisingly nontrivial task, as it turns out. For example, the most straightforward approximation of this probability from our MCMC output is

$$\Pr(N_{01} \leq M \mid \mathbf{y}) \approx \frac{1}{L} \sum_{l=1}^L 1_{\{N_{01}^{(l)} \leq M\}},$$

where  $1_{\{\cdot\}}$  is an indicator function. This approximation has substantial Monte Carlo error, a result of the large variance of  $N_{01}$ , which makes using this approximation infeasible for Bayes factor calculations, especially when  $\Pr(N_{01} \leq M \mid \mathbf{y})$  is close to 0 or to 1. Alternatively, a better approximation can be formed as follows:

$$\Pr(N_{01} \leq M \mid \mathbf{y}) \approx \frac{1}{L} \sum_{l=1}^L \Pr(N_{01}^{(l)} \leq M \mid \mathbf{y}, \lambda_{01}^{(l)}, \lambda_{10}^{(l)}, \tau^{(l)}), \quad (4)$$

where  $\Pr(N_{01} \leq M \mid \mathbf{y}, \lambda_{01}, \lambda_{10}, \tau)$  is the posterior probability of at most  $m$  jumps on a fixed tree  $\tau$ , assuming known gain and loss rates,  $\lambda_{01}$  and  $\lambda_{10}$ . To compute the last posterior probability, we first compute  $\Pr(N_{01} = m \mid \mathbf{y}, \lambda_{01}, \lambda_{10}, \tau)$  for  $m = 0, \dots, M$  and then sum these probabilities to obtain the desired quantity.

Computing  $\Pr(N_{01} = m \mid \mathbf{y}, \lambda_{01}, \lambda_{10}, \tau)$  can be accomplished by combining analytic results of Minin and Suchard [2008] and a dynamic programming algorithm of Siepel et al. [2006]. We further extend the analytic results of Minin and Suchard [2008] with an alternate representation of the two-state model solution to improve the numerical stability of our calculations. We compute the prior probability of at most  $M$  jumps using an approximation analogous to formula (4), with the exception of averaging over independent draws from priors of  $\lambda_{01}$  and  $\lambda_{10}$ , and over uniform draws of candidate phylogenies  $\tau_1, \dots, \tau_K$ .

## Implementation and illustrations

Software implementing the above procedure is available in the form of an open-source R package `indorigin` (<https://github.com/vnminin/indorigin>). To install the package install the `devtools` package and then install `indorigin` using ‘`install_github`’ command:

```
## install.packages("devtools") # uncomment if "devtools" is not installed
## install_github("unminin/indorigin") # uncomment or copy and paste into R terminal
library(indorigin)

## Loading required package: Rcpp
## Loading required package: RcppArmadillo
## Loading required package: testthat
```

Notice that installing from github requires installing the package from source. To learn about package installation see <http://cran.r-project.org/doc/manuals/R-admin.html>.

## Simulated data

Let's simulate a tree and fast/slow evolving binary traits on this tree.

```
library(diversitree) # diversitree is only needed for simulations

## Loading required package: deSolve
## Loading required package: ape
## Loading required package: subplex
## Loading required package: methods

set.seed(3245)

## Simulate a tree
phy<-NULL
while(is.null(phy)){
  phy <- tree.bd(c(.1, .03), max.taxa=50)
}

## Simulate FAST EVOLVING 0/1 characters on this tree
states1 <- sim.character(phy, c(.03, .1), x0=1, model="mk2")

## Simulate SLOW EVOLVING 0/1 characters on this tree
states2 <- sim.character(phy, c(.001, .01), x0=1, model="mk2")
```

First, we analyze the data simulated under the fast evolving trait regime. In this case, the Bayes factor strongly rejects the hypothesis that there were 0 gains of the trait.

```
## run the independent origin analysis on the simulated data.
## Notice that the first argument must be a list of trees even if you are
## supplying one tree. Hence, c(phy) command.
testIndOriginResults1 = testIndOrigin(inputTrees=c(phy), traitData=states1,
  initLambda01=.01, initLambda10=.01, priorAlpha01=1, priorBeta01=10,
  priorAlpha10=1, priorBeta10=10, mcmcSize=2100, mcmcBurnin=100,
  mcmcSubsample=1, mcSize=10000)

## pre-processing trees and trait data
```

```

## plot the tree with the simulated histories at all nodes
par(mfrow=c(1,2))
plot(phy, show.tip.label=FALSE, no.margin=TRUE)
col <- c("#004165", "#eaab00")
tiplabels(col=col[states1+1], pch=19, adj=1)
nodelabels(col=col[attr(states1, "node.state")+1], pch=19)

plot(phy, show.tip.label=FALSE, no.margin=TRUE)
col <- c("#004165", "#eaab00")
tiplabels(col=col[states2+1], pch=19, adj=1)
nodelabels(col=col[attr(states2, "node.state")+1], pch=19)

```

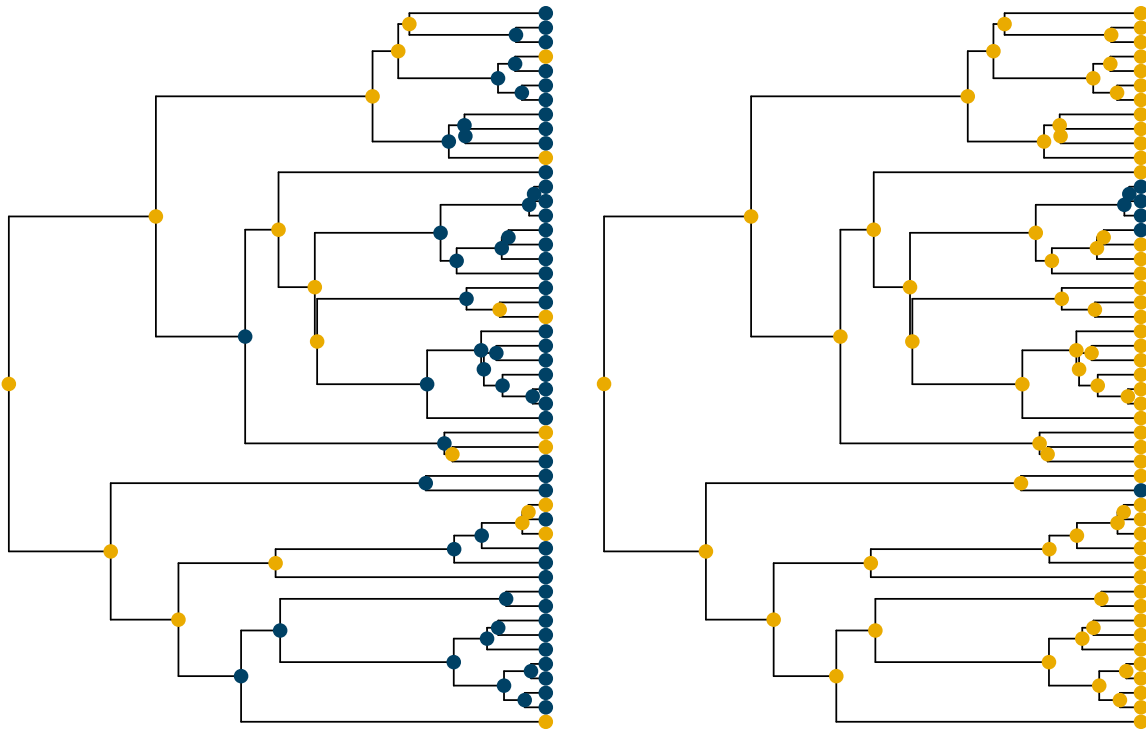

Figure 1: Fast (left figure) and slow (right figure) evolving binary traits with true internal node states plotted.

```

## running Gibbs sampler
## Computing posterior probabilities
## Computing prior probabilities

getBF(testIndOriginResults1)

## BF for N01<=0      log10(BF)      2xlog_e(BF)
##      5.173e-06      -5.286e+00      -2.434e+01

```

When we perform a similar analysis for the slow evolving trait, the Bayes factor supports the hypothesis of 0 gains, but the support is very weak. This is expected, because data generated under the slow evolving model have very little information about the gain/loss rates, so there is a lot of uncertainty about these rates.

```

testIndOriginResults2 = testIndOrigin(inputTrees=c(phy), traitData=states2,
initLambda01=.01, initLambda10=0.1, priorAlpha01=1, priorBeta01=10,
priorAlpha10=1, priorBeta10=10, mcmcSize=2100, mcmcBurnin=100,
mcmcSubsample=1, mcSize=10000)

## pre-processing trees and trait data
## running Gibbs sampler
## Computing posterior probabilities
## Computing prior probabilities

getBF(testIndOriginResults2)

## BF for N01<=0      log10(BF)      2xlog_e(BF)
##      1.11587        0.04761        0.21927

```

## Photophores data

First, we are going to load 1000 phylogenies of 70 cephalopod species and a corresponding vector of trait values (presence/absence of photophores).

```

library(ape)

cephalopodTrees = read.tree("BLsonboots70.phy")
tree.num = length(cephalopodTrees)
cephalopodTraits = read.csv("BLspecies70.csv", header=FALSE)

# a little massaging to get trait data into a vector format
tip.num = dim(cephalopodTraits)[1]
cephalopodTraitVec = numeric(tip.num)
tipNames = as.character(cephalopodTraits[,1])
cephalopodTraitVec = cephalopodTraits[,2]
names(cephalopodTraitVec) = tipNames

# run the analysis

```

```

cephalopodIndOriginResults = testIndOrigin(inputTrees=cephalopodTrees,
traitData=cephalopodTraitVec,initLambda01=.01, initLambda10=0.1,
priorAlpha01=1, priorBeta01=100, priorAlpha10=1, priorBeta10=10,
mcmcSize=1100, mcmcBurnin=100, mcmcSubsample=1, mcSize=1000, testThreshold=2)

## pre-processing trees and trait data
## running Gibbs sampler
## Computing posterior probabilities
## Computing prior probabilities

# get the Bayes factor
getBF(cephalopodIndOriginResults)

## BF for N01<=2      log10(BF)      2xlog_e(BF)
##      3.722e-06      -5.429e+00      -2.500e+01

```

The above results reproduce the Bayes factors in the 7<sup>th</sup> row of the SI Table 2. To reproduce the rest of the rows, one can change ‘priorBeta01’, ‘priorBeta10’, and ‘testThreshold’ parameters to manipulate the priors and the hypotheses. Note that we kept the number of MCMC iterations low, so it is possible to reproduce all of the above examples quickly. You should increase this number when attempting your own analyses.

## References

- R.E. Kass and A.E. Raftery. Bayes factors. Journal of the American Statistical Association, 90:773–795, 1995.
- N. Lartillot. Conjugate Gibbs sampling for Bayesian phylogenetic models. Journal of Computational Biology, 13:1701–1722, 2006.
- V.N. Minin and M.A. Suchard. Counting labeled transitions in continuous-time Markov models of evolution. Journal of Mathematical Biology, 56:391–412, 2008.
- R. Nielsen. Mapping mutations on phylogenies. Systematic Biology, 51:729–739, 2002.
- M. Pagel, A. Meade, and D. Barker. Bayesian estimation of ancestral character states on phylogenies. Systematic Biology, 53:673–684, 2004.
- F. Ronquist, M. Teslenko, P. van der Mark, D.L. Ayres, A. Darling, S. Höhna, B. Larget, L. Liu, M.A. Suchard, and J.P. Huelsenbeck. MrBayes 3.2: efficient Bayesian phylogenetic inference and model choice across a large model space. Systematic Biology, 61:539–542, 2012.
- A. Siepel, K.S. Pollard, and D. Haussler. New methods for detecting lineage-specific selection. In Proceedings of the 10th International Conference on Research in Computational Molecular Biology, pages 190–205, 2006.

SI Table 1. GenBank sequence identifiers (GI numbers) for loci used in analysis listed alphabetically. Changes to the species name used in this manuscript are listed in bold. Newly generated sequences indicated by yellow cells.

| GenBank Name                    | 12S        | 16S        | 18S       | ald3       | ATPsynth   | COI        | cytb       | ef1a       | H3        | odh        | opsin      | pax        |
|---------------------------------|------------|------------|-----------|------------|------------|------------|------------|------------|-----------|------------|------------|------------|
| Afrololigo mercatoris           |            | 93004770   |           |            |            | 194474586  |            |            |           |            | 194474656  |            |
| Alloteuthis africana            |            | 194474470  |           |            |            | 194474508  |            |            |           |            | 194474600  |            |
| Alloteuthis media               |            | 194474490  |           |            |            | 194474550  |            |            |           |            | 194474634  |            |
| Alloteuthis subulata            |            | 194474505  |           |            |            | 194474580  |            |            |           |            | 194474650  |            |
| Argonauta nodosa                | 45510911   | 45510935   | 49482067  |            |            | 4003405    | 76359244   |            | 50346987  | 45510951   | 45511050   |            |
| Chiroteuthis calyx              |            | 209969953  | 209969999 |            |            | 209970103  |            |            | 209970211 |            |            |            |
| Loligo gahi                     |            | 93004761   |           |            |            | 5678658    |            |            |           |            |            |            |
| <b>= Doryteuthis gahi</b>       |            |            |           |            |            |            |            |            |           |            |            |            |
| Loligo opalescens               | 2402666124 | 2402666123 |           |            |            | 2402666121 | 2402666122 |            |           | 12055096   |            | 1778016    |
| <b>= Doryteuthis opalescens</b> |            |            |           |            |            |            |            |            |           |            |            |            |
| Loligo pealei                   |            | 56567271   | 34369176  |            |            | 18026439   | EF423109_1 |            | 38607257  |            | AY450853_1 |            |
| <b>= Doryteuthis pealeii</b>    |            |            |           |            |            |            |            |            |           |            |            |            |
| Loligo plei                     |            | 93004765   |           |            |            | 14120087   |            |            |           |            |            |            |
| <b>= Doryteuthis plei</b>       |            |            |           |            |            |            |            |            |           |            |            |            |
| Eledone cirrhosa                | 48994420   | 18073265   | 49482072  |            |            |            |            |            |           | 48994473   | 48994575   | 48994529   |
| Enteroctopus dofleini           | 62005876   | 45510940   |           |            |            | 62084159   | 239735795  | JF927838_1 |           | 45510965   | 45510966   | 45511018   |
| Euprymna berryi                 | 34542045   | 14161379   |           |            |            | 13195587   |            |            |           |            |            |            |
| Euprymna hyllebergi             | 34542048   | 34542074   |           |            |            | 34542132   |            |            |           |            |            |            |
| Euprymna morsei                 | 62005906   | 34542070   |           |            |            |            |            |            |           |            |            |            |
| Euprymna scolopes               | 34542046   | 34542072   |           |            | JF927843_1 | 34542128   |            | JF927842_1 |           | 48994346   | 48994378   | 21667880   |
| Euprymna tasmanica              | 34542047   | 34542073   |           |            |            | 34542130   |            |            |           |            | 48994587   | 48994541   |
| Graneledone verrucosa           | 45510922   | 82561543   | 49482073  |            |            | 4003433    |            |            | 50346991  | 45510973   | 158828841  | 45511024   |
| Heterololigo bleekeri           | 97906254   | 97906253   |           |            |            | 979062511  | 97906252   |            |           |            |            |            |
| Heteroteuthis hawaiiensis       | 34542063   | 34542089   | 49482077  |            |            | 34542160   |            |            | 50346997  | 48994344   | 48994376   | 48994406   |
| Idiosepius paradoxus            | 62005903   | 62005892   |           |            |            | 62084191   |            |            |           |            |            | AB716344_1 |
| Loligo forbesi                  | 45510930   | 498938     |           |            |            | 5678661    |            |            |           | 45510987   | 45511086   | 45511040   |
| Loligo reynaudii                |            | 93004766   |           |            |            | 5678665    |            |            |           |            |            |            |
| Loligo vulgaris                 | 77157317   | 498939     |           |            |            | 5678656    |            |            |           | 13561066   |            |            |
| Loliolus beka                   |            | 384228941  |           |            |            | 384228950  |            |            |           |            |            |            |
| Loliolus japonica               |            | 93004768   |           |            |            | 5678666    | 145244494  |            |           |            |            |            |
| Loliolus uyii                   |            | 325073373  |           |            |            | 330426895  |            |            |           |            |            |            |
| Lolliguncula brevis             | 48762898   | 93004769   |           |            |            | 5678655    |            |            |           | 48994332   | 48994364   | 48994394   |
| Lolliguncula diomedea           |            | 209969959  | 209969984 |            |            | 209970073  |            |            | 209970169 |            |            |            |
| Nautilus macromphalus           | 944906654  | 9449066533 | 17385427  |            |            | 911773921  | 944906652  |            |           |            |            |            |
| Nautilus pompilius              | 48994439   | 38607021   | 34369177  | JF927850_1 |            | 18026437   |            | JX036488_1 |           |            |            | 48994567   |
| Nautilus scrobiculatus          |            | 571333     | 18026322  |            |            |            |            |            |           |            |            |            |
| Neorossia caroli                |            | 117960047  |           |            |            |            |            |            |           |            |            |            |
| Octopus bimaculoides            | 45510917   | 18076178   |           | JF927853_1 |            | 15421827   |            | JF927854_1 |           | 45510961   | 45511062   | 45511014   |
| Octopus vulgaris                | 537938874  | 537938873  |           |            |            | 537938871  | 537938872  |            |           | HM104284_1 | 116829804  | HM104274_1 |
| Rondeletiola minor              | 34542060   | 34542086   |           |            |            | 34542154   |            |            |           |            |            |            |
| Rossia bipapillata              | 34542059   | 34542085   |           |            |            |            |            |            |           |            |            |            |
| Rossia pacifica                 | 62005904   | 62005893   |           |            |            | 5353806    |            |            |           | 48994342   | 48994374   | 48994404   |
| Rossia palpebrosa               |            | 209969908  | 49482078  |            |            | 4003471    |            |            | 50346999  |            |            |            |
| Semirossia tenera               | 38374163   | 38374164   |           |            |            | 38374165   |            |            |           |            |            |            |
| Sepia officinalis               | 892552844  | 892552843  | 49482076  | FO202690.1 | FO162309_1 | 892552841  | 892552842  | FO202892_1 | 50346995  | 13561068   | 315075492  | 121495688  |
| Sepiadarium austrinum           | 48994423   | 48994450   |           |            |            |            |            |            |           | 48994479   | 48994581   | 48994535   |



SI Table 1. GenBank sequence identifiers (GI numbers) for loci used in analysis listed alphabetically. Changes to the species name used in this manuscript are listed in bold. Newly generated sequences indicated by yellow cells.

| GenBank Name              | 12S        | 16S        | 18S       | ald3 | ATPsynth | COI        | cytb       | ef1a | H3        | odh      | opsin    | pax      |
|---------------------------|------------|------------|-----------|------|----------|------------|------------|------|-----------|----------|----------|----------|
| Sepiadarium kochi         | 62005907   | 34542087   |           |      |          | 38154317   |            |      |           |          |          |          |
| Sepietta neglecta         | 34542056   | 34542082   |           |      |          | 34542148   |            |      |           |          |          |          |
| Sepietta obscura          | 34542057   | 34542083   |           |      |          | 34542150   |            |      |           |          |          |          |
| Sepietta oweniana         | 34542058   | 34542084   |           |      |          | 34542152   |            |      |           |          |          |          |
| Sepietta sp.              |            | 498954     |           |      |          |            |            |      |           |          |          |          |
| Sepiola affinis           | 34542050   | 209969909  | 49482079  |      |          | 34542136   |            |      | 50347001  |          |          |          |
| Sepiola atlantica         | 34542055   | 34542081   |           |      |          | 34542146   |            |      |           |          |          |          |
| Sepiola birostrata        | 34542049   | 34542075   |           |      |          | 34542134   |            |      |           |          |          |          |
| Sepiola intermedia        | 34542052   | 34542078   |           |      |          | 34542140   |            |      |           |          |          |          |
| Sepiola ligulata          | 34542051   | 34542077   |           |      |          | 34542138   |            |      |           |          |          |          |
| Sepiola robusta           | 34542053   | 34542079   |           |      |          | 34542142   |            |      |           |          |          |          |
| Sepiola rondeleti         | 34542054   | 34542080   |           |      |          | 34542144   |            |      |           |          |          |          |
| Sepiolina nipponensis     | 34542062   | 34542088   |           |      |          | 34542158   |            |      |           |          |          |          |
| Sepioloidea lineolata     | 48994422   | 48994449   |           |      |          | 4003477    |            |      |           | 48994477 | 48994579 | 48994533 |
| Sepioteuthis australis    | 48762899   | 93004772   |           |      |          | 4003479    |            |      |           | 48994334 | 48994366 | 48994396 |
| Sepioteuthis lessoniana   | 892554074  | 892554073  | 49482085  |      |          | 890008521  | 892554072  |      | 50347013  | 48994336 | 48994368 | 48994398 |
| Sepioteuthis sepioidea    |            | 93004775   |           |      |          | 5678651    |            |      |           |          |          |          |
| Stauroteuthis gilchristi  | 45510909   | 45510933   |           |      |          |            |            |      |           | 45510947 | 45511046 | 45510998 |
| Stauroteuthis syrtensis   |            | 82622206   | 49482062  |      |          | 4003483    |            |      | 50346978  |          |          |          |
| Stoloteuthis leucoptera   | 34542064   | 209969910  | 49482080  |      |          | 4003485    |            |      | 50347003  |          |          |          |
| Taonius pavo              | AY616959   | 209969961  | 209969992 |      |          | 209970121  |            |      | 209970184 |          |          |          |
| Uroteuthis chinensis      |            | 209969912  | 23450949  |      |          | 28207579   |            |      | 50347009  |          |          |          |
| Uroteuthis duvauceli      |            | 3618168    |           |      |          | 5678659    |            |      |           |          |          |          |
| Uroteuthis etheridgei     |            | 93004779   |           |      |          |            |            |      |           |          |          |          |
| Uroteuthis edulis         |            | 3618173    |           |      |          | 169247791  |            |      |           |          |          |          |
| Uroteuthis noctiluca      | 34542041   | 34542065   |           |      |          | 34542116   |            |      |           |          |          |          |
| Uroteuthis sp. JMS 2004   | 48762901   | 48762912   |           |      |          |            |            |      |           | 48994338 | 48994370 | 48994400 |
| Vampyroteuthis infernalis | 1531248574 | 1531248573 | 34369180  |      |          | 1531248571 | 1531248572 |      | 50346982  | 45510945 | 45511044 | 45510996 |

Legend

Black text GI number for public data  
 sequence generated in this study

 **Nautilus pompilius:**  
sequence assembled from available short-read datasets:  
Accessions: SRR330442; SRR108979; DRR001114; DRR001111

 **Octopus vulgaris:**  
sequence assembled from available short-read datasets:  
Accessions: SRR1946; SRR108980

 **Idiosepius paradoxus:**  
sequence assembled from available short-read datasets:  
Accessions DRR001110; DRR001113:

| Hypotheses compared for Bayes Factor test | Priors on rates of gain:loss | Prior Probability on H0 | BF              | log10(BF)    | 2xlog_e(BF)   | Posterior Probability on H0 |
|-------------------------------------------|------------------------------|-------------------------|-----------------|--------------|---------------|-----------------------------|
| HA: Ngains >=2<br>H0: Ngains <=1          | 1:100                        | 0.9999944               | 1.08E-06        | -5.97        | -27.47        | 0.162277                    |
|                                           | <i>1:10</i>                  | <i>0.9995186</i>        | <i>3.29E-06</i> | <i>-5.48</i> | <i>-25.25</i> | <i>0.00677985</i>           |
|                                           | 1:1                          | 0.9817623               | 6.23E-06        | -5.21        | -23.97        | 0.00033508                  |
|                                           | 10:1                         | 0.9981345               | 3.54E-12        | -11.45       | -52.73        | 1.89E-09                    |
|                                           | 100:1                        | 0.9998135               | 5.63E-19        | -18.25       | -84.04        | 3.02E-15                    |
| HA: Ngains >=3<br>H0: Ngains <=2          | 1:100                        | 1                       | 3.05E-08        | -7.52        | -34.61        | 0.4422237                   |
|                                           | <i>1:10</i>                  | <i>0.9999708</i>        | <i>3.82E-06</i> | <i>-5.42</i> | <i>-24.95</i> | <i>0.115802</i>             |
|                                           | 1:1                          | 0.993742                | 2.07E-04        | -3.68        | -16.96        | 0.031836                    |
|                                           | 10:1                         | 0.9993716               | 5.04E-07        | -6.30        | -29.00        | 0.00080095                  |
|                                           | 100:1                        | 0.9999358               | 9.45E-11        | -10.02       | -46.17        | 1.47E-06                    |
| HA: Ngains >=4<br>H0: Ngains <=3          | 1:100                        | 1                       | 6.17E-09        | -8.21        | -37.81        | 0.9644096                   |
|                                           | <i>1:10</i>                  | <i>0.9999982</i>        | <i>1.12E-05</i> | <i>-4.95</i> | <i>-22.79</i> | <i>0.865057</i>             |
|                                           | 1:1                          | 0.9977474               | 4.82E-03        | -2.32        | -10.67        | 0.6810581                   |
|                                           | 10:1                         | 0.9997861               | 1.31E-04        | -3.88        | -17.87        | 0.3806625                   |
|                                           | 100:1                        | 0.9999785               | 8.03E-07        | -6.10        | -28.07        | 0.0360379                   |
| HA: Ngains >=5<br>H0: Ngains <=4          | 1:100                        | 1                       | 3.37E-09        | -8.47        | -39.02        | 0.9995157                   |
|                                           | <i>1:10</i>                  | <i>0.9999999</i>        | <i>9.63E-06</i> | <i>-5.02</i> | <i>-23.10</i> | <i>0.991713</i>             |
|                                           | 1:1                          | 0.9992335               | 7.95E-03        | -2.10        | -9.67         | 0.912042                    |
|                                           | 10:1                         | 0.9999263               | 1.09E-04        | -3.96        | -18.25        | 0.5968848                   |
|                                           | 100:1                        | 0.9999926               | 8.37E-07        | -6.08        | -27.99        | 0.1018062                   |

**SI Table 2. Results of Test of Independent Origins.**

The Bayes Factor test results for MCMC runs under 4 different null-alternative hypothesis pairs. For each hypothesis test, the rates of gain and loss were varied in the prior parameters, ranging from 1:100 (losses occur, on average, 100 times more often than gains) to 100:1 (gains 100 times more frequent). Earlier ML analysis under a 2-rate model estimated losses 10 more likely than gains (italized rows). Bayes Factors strongly and consistently favored hypotheses of at least 2 or 3 gains across rate priors tested. Posterior probabilities indicate that these null hypotheses are least favored under priors which increase the relative rate of loss.

|                           |                                                                                                                                           | <i>U. edulis</i>                                                                                                                                    | <i>E. scolopes</i>                                                                                                              |
|---------------------------|-------------------------------------------------------------------------------------------------------------------------------------------|-----------------------------------------------------------------------------------------------------------------------------------------------------|---------------------------------------------------------------------------------------------------------------------------------|
| Control genes             | <i>actin</i>                                                                                                                              | <i>Ue_actinRT_F</i> <b>56</b> CACCGCCGAGAGAGAAATTG<br><i>Ue_actinRT_R</i> <b>55.9</b> CCTGTTCGAAGTCAAGAGCG<br><i>amplicon(bp)</i> <b>71</b>         | <i>Es_actinRT_F</i> <b>56.4</b> ATGTTCCCCGGTATTGCTGA<br><i>Es_actinRT_R</i> <b>56.3</b> CGCCGATCCAGACAGAGTAT<br><b>115</b>      |
|                           | <i>18s</i>                                                                                                                                | <i>RT_Sepiola_18s-F</i> <b>53.7</b> CGTTTTCTCGATCAAGAGC<br><i>RT_Sepiola_18s-R</i> <b>54.8</b> CATCGTTTACGGTCGGAAC<br><i>amplicon(bp)</i> <b>77</b> | <i>RT_Sepiola_18s-F</i> <b>53.7</b> CGTTTTCTCGATCAAGAGC<br><i>RT_Sepiola_18s-R</i> <b>54.8</b> CATCGTTTACGGTCGGAAC<br><b>77</b> |
| Photo-detection           | <i>opsin</i>                                                                                                                              | <i>Ue_ops_F</i> <b>56.1</b> GGGCTATCGGCCCTATCT<br><i>Ue_ops_R</i> <b>54.9</b> AATGTTGGATCGTGTAGCTGTATC<br><i>amplicon(bp)</i> <b>107</b>            | <i>RT_Es_Op_F</i> <b>54.8</b> CGAAGCATATGAGCCACAGA<br><i>RT_Es_Op_R</i> <b>55.7</b> CCGATAGCCCATAGGACAGA<br><b>76</b>           |
|                           | <i>loph-opsin</i>                                                                                                                         | <i>amplicon(bp)</i>                                                                                                                                 | <i>Es_lophops_F</i> CTCTCAATCAGCACGCTAACA<br><i>Es_lophops_R</i> GCCCAGAAGATGGCATAAC<br><b>140</b>                              |
|                           | <i>cry1</i>                                                                                                                               | <i>Ue_cry1_F</i> <b>53</b> TGCTTTGAAAAAGCCTTACA<br><i>Ue_cry1_R</i> <b>53.2</b> GGACGAATTCACCATTCTATC<br><i>amplicon(bp)</i> <b>86</b>              | <i>Es_cry1_F</i> <b>54</b> TGTATGGCATGAGGATGGATAG<br><i>Es_cry1_R</i> <b>54.4</b> TTCCACGGACAAAAACAGATACTT<br><b>97</b>         |
|                           | <i>cry2</i>                                                                                                                               | <i>Ue_cry2_F</i> <b>55.9</b> GACTGGTTTCCCCTGGATAGA<br><i>Ue_cry2_R</i> <b>54.3</b> CCAAAGATCACCTCTGGTTAAGA<br><i>amplicon(bp)</i> <b>112</b>        | <i>Es_cry2_F</i> <b>56.1</b> GACTGGCTTCCCTGGATAGA<br><i>Es_cry2_R</i> <b>54.3</b> CCAAAGATCACCTCTGGTTAAGA<br><b>112</b>         |
|                           | <i>s-crystallin</i>                                                                                                                       | <i>Ue_ScrystRT_F</i> <b>55.8</b> TGGACATGATGAGGTGTGACT<br><i>Ue_ScrystRT_R</i> <b>55.9</b> TCCGTTCTCCAGTGGTAGTAC<br><i>amplicon(bp)</i> <b>86</b>   | <i>Es_ScrystRT_F</i> <b>56.1</b> GGTACTTGCCCGTGAATTC<br><i>Es_ScrystRT_R</i> <b>55.8</b> GAAGCGTCCGTTCTTTTCGT<br><b>134</b>     |
| <i>o-crystallin</i>       | <i>Ocrys_Ue_F</i> <b>54.9</b> TTGAACCAACCGTCTTCTCC<br><i>Ocrys_Ue_R</i> <b>55.1</b> GCCATTCCATAGTCGGTGT<br><i>amplicon(bp)</i> <b>142</b> | <i>Ocrys_Es_F</i> <b>52.6</b> GCGGAAAGAGCAATTTGAAG<br><i>Ocrys_Es_R</i> <b>54.8</b> ACCGGACCAATGAGATTGAC<br><b>146</b>                              |                                                                                                                                 |
| Immuno/symbiosis proteins | <i>NFkappaB</i>                                                                                                                           | <i>nfk_Ue_F</i> <b>54.9</b> TGTGAAACCTGAGCTTCTG<br><i>nfk_Ue_R</i> <b>56.8</b> TTTCTTCTGGTGGTGGTCT<br><i>amplicon(bp)</i> <b>110</b>                | <i>nfk_Es_F</i> <b>56.3</b> GAAGCTGCTGGTTGCCTTC<br><i>nfk_Es_R</i> <b>55.4</b> GGATGTTGCTGCCTGAATCT<br><b>66</b>                |
|                           | <i>peroxidase</i>                                                                                                                         | <i>Ue_peroxRT_F</i> <b>55.1</b> GGGTGACCGATTCTGGTATG<br><i>Ue_peroxRT_R</i> <b>54</b> TCCTGGATTGTTGGATGT<br><i>amplicon(bp)</i> <b>127</b>          | <i>Es_peroxRT_F</i> <b>54.7</b> TTCCGAAGATGACGCTAACC<br><i>Es_peroxRT_R</i> <b>56.2</b> TCAGAAACACCACCACTCCA<br><b>81</b>       |
|                           | <i>TLR</i>                                                                                                                                |                                                                                                                                                     |                                                                                                                                 |

SI Table 3. Primers used for relative quantitative PCR in *E.scolopes* and *U. edulis*.

| <i>Euprymna scolopes</i> transcriptomes | Prediction score of each <i>Euprymna</i> sample under <i>Uroteuthis</i> GLM transcriptome model of tissue types |        |        |               |               |               |        |
|-----------------------------------------|-----------------------------------------------------------------------------------------------------------------|--------|--------|---------------|---------------|---------------|--------|
|                                         | ang                                                                                                             | brain  | eye    | gill          | phot          | skin          |        |
|                                         | Es1_skin                                                                                                        | 0.0268 | 0.0047 | 0.007         | 0.0339        | 0.0024        | 0.9253 |
| Es1_phot                                | 0.1393                                                                                                          | 0.0286 | 0.0267 | 0.0878        | 0.6291        | 0.0885        |        |
| Es1_gill                                | 0.0192                                                                                                          | 0.0115 | 0.0083 | 0.9463        | 0.0018        | 0.0129        |        |
| Es1_eye                                 | 0.0015                                                                                                          | 0.0018 | 0.9876 | 0.0004        | 0.0005        | 0.0083        |        |
| Es1_brain                               | 0.0046                                                                                                          | 0.975  | 0.0065 | 0.0039        | 0.0013        | 0.0086        |        |
| Es1_ang                                 | 0.8589                                                                                                          | 0.0093 | 0.0133 | 0.024         | 0.0036        | 0.0911        |        |
| Es2_skin                                | 0.0066                                                                                                          | 0.0027 | 0.0086 | 0.0226        | 0.005         | 0.9545        |        |
| Es2_phot                                | 0.0514                                                                                                          | 0.0234 | 0.0574 | 0.0862        | 0.5309        | 0.2508        |        |
| Es2_gill                                | 0.0065                                                                                                          | 0.011  | 0.0267 | 0.8537        | 0.0052        | 0.0968        |        |
| Es2_eye                                 | 0.0031                                                                                                          | 0.006  | 0.979  | 0.0013        | 0.0014        | 0.0092        |        |
| Es2_brain                               | 0.0029                                                                                                          | 0.9792 | 0.0075 | 0.0028        | 0.0013        | 0.0063        |        |
| Es2_ang                                 | 0.476                                                                                                           | 0.0087 | 0.019  | 0.0182        | 0.0051        | 0.473         |        |
| Es3_skin                                | 0.0119                                                                                                          | 0.0077 | 0.0082 | 0.0467        | 0.0051        | 0.9205        |        |
| Es3_phot                                | 0.0879                                                                                                          | 0.015  | 0.0155 | 0.0675        | 0.6509        | 0.1632        |        |
| Es3_gill                                | 0.0074                                                                                                          | 0.0114 | 0.0067 | 0.9583        | 0.0012        | 0.015         |        |
| Es3_eye                                 | 0.0007                                                                                                          | 0.0014 | 0.9956 | 0.0004        | 0.0003        | 0.0016        |        |
| Es3_brain                               | 0.0072                                                                                                          | 0.9543 | 0.0096 | 0.0047        | 0.002         | 0.0221        |        |
| Es3_ang                                 | 0.8466                                                                                                          | 0.0142 | 0.0116 | 0.0181        | 0.0076        | 0.1019        |        |
|                                         | P-values:<br>probability of observed prediction on 10000 bootstrapped transcriptomes                            |        |        |               |               |               |        |
|                                         | ang                                                                                                             | brain  | eye    | gill          | phot          | skin          |        |
| Es1_skin                                | 0.8982                                                                                                          | 0.9996 | 0.9972 | 0.8731        | 0.9832        | <b>0.0033</b> |        |
| Es1_phot                                | 0.3399                                                                                                          | 0.9164 | 0.9239 | 0.5982        | <b>0.0004</b> | 0.8854        |        |
| Es1_gill                                | 0.945                                                                                                           | 0.9924 | 0.9953 | 0             | 0.9907        | 0.9966        |        |
| Es1_eye                                 | 0.9999                                                                                                          | 0.9999 | 0      | 1             | 0.9999        | 0.9985        |        |
| Es1_brain                               | 0.998                                                                                                           | 0      | 0.9975 | 0.9999        | 0.996         | 0.9984        |        |
| Es1_ang                                 | <b>0.0001</b>                                                                                                   | 0.9959 | 0.9806 | 0.9254        | 0.9576        | 0.8807        |        |
| Es2_skin                                | 0.996                                                                                                           | 0.9999 | 0.9946 | 0.9317        | 0.9224        | <b>0.0001</b> |        |
| Es2_phot                                | 0.7427                                                                                                          | 0.9462 | 0.7473 | 0.6051        | <b>0.0021</b> | 0.6038        |        |
| Es2_gill                                | 0.996                                                                                                           | 0.9931 | 0.9239 | <b>0.0002</b> | 0.9185        | 0.8708        |        |
| Es2_eye                                 | 0.9991                                                                                                          | 0.9992 | 0      | 0.9999        | 0.9945        | 0.9983        |        |
| Es2_brain                               | 0.9994                                                                                                          | 0      | 0.9964 | 0.9998        | 0.9965        | 0.999         |        |
| Es2_ang                                 | <b>0.0244</b>                                                                                                   | 0.9965 | 0.9583 | 0.9536        | 0.9208        | 0.3106        |        |
| Es3_skin                                | 0.9799                                                                                                          | 0.9979 | 0.9955 | 0.7983        | 0.9218        | <b>0.0043</b> |        |
| Es3_phot                                | 0.5348                                                                                                          | 0.9835 | 0.9727 | 0.6932        | <b>0.0003</b> | 0.7499        |        |
| Es3_gill                                | 0.9945                                                                                                          | 0.9924 | 0.9974 | 0             | 0.9966        | 0.9957        |        |
| Es3_eye                                 | 0.9999                                                                                                          | 0.9999 | 0      | 0.9999        | 0.9999        | 0.9999        |        |
| Es3_brain                               | 0.9949                                                                                                          | 0      | 0.9921 | 0.9981        | 0.9884        | 0.9903        |        |
| Es3_ang                                 | <b>0.0002</b>                                                                                                   | 0.9851 | 0.9862 | 0.954         | 0.8551        | 0.8605        |        |

  

| <i>Uroteuthis edulis</i> transcriptomes | Prediction score of each <i>Uroteuthis</i> sample under <i>Euprymna</i> GLM transcriptome model tissue types |               |        |               |               |               |        |
|-----------------------------------------|--------------------------------------------------------------------------------------------------------------|---------------|--------|---------------|---------------|---------------|--------|
|                                         | ang                                                                                                          | brain         | eye    | gill          | phot          | skin          |        |
|                                         | Ue1_skin                                                                                                     | 0.082         | 0.3002 | 0.2957        | 0.0106        | 0.0137        | 0.2978 |
| Ue1_phot                                | 0.103                                                                                                        | 0.4288        | 0.1332 | 0.1359        | 0.1823        | 0.0168        |        |
| Ue1_gill                                | 0.034                                                                                                        | 0.0904        | 0.0925 | 0.7113        | 0.013         | 0.0587        |        |
| Ue1_eye                                 | 0.0032                                                                                                       | 0.0124        | 0.9764 | 0.0025        | 0.0038        | 0.0018        |        |
| Ue1_brain                               | 0.0019                                                                                                       | 0.9772        | 0.0155 | 0.0015        | 0.0026        | 0.0013        |        |
| Ue1_ang                                 | 0.4838                                                                                                       | 0.1889        | 0.1223 | 0.0519        | 0.1359        | 0.0172        |        |
| Ue2_skin                                | 0.0229                                                                                                       | 0.735         | 0.1749 | 0.0057        | 0.0114        | 0.05          |        |
| Ue2_phot                                | 0.1177                                                                                                       | 0.2616        | 0.1532 | 0.1039        | 0.3197        | 0.0439        |        |
| Ue2_gill                                | 0.0448                                                                                                       | 0.166         | 0.1148 | 0.5228        | 0.0037        | 0.1479        |        |
| Ue2_eye                                 | 0.0016                                                                                                       | 0.0127        | 0.9797 | 0.0024        | 0.001         | 0.0026        |        |
| Ue2_brain                               | 0.0018                                                                                                       | 0.9775        | 0.0167 | 0.0019        | 0.0016        | 0.0005        |        |
| Ue2_ang                                 | 0.7395                                                                                                       | 0.0811        | 0.0554 | 0.0867        | 0.029         | 0.0082        |        |
| Ue3_skin                                | 0.0415                                                                                                       | 0.3851        | 0.2809 | 0.0123        | 0.0626        | 0.2175        |        |
| Ue3_phot                                | 0.1344                                                                                                       | 0.3099        | 0.1455 | 0.1137        | 0.2031        | 0.0936        |        |
| Ue3_gill                                | 0.0527                                                                                                       | 0.0998        | 0.0677 | 0.6855        | 0.0131        | 0.0812        |        |
| Ue3_eye                                 | 0.0117                                                                                                       | 0.0472        | 0.9288 | 0.0046        | 0.0013        | 0.0064        |        |
| Ue3_brain                               | 0.0021                                                                                                       | 0.9552        | 0.0282 | 0.0028        | 0.011         | 0.0007        |        |
| Ue3_ang                                 | 0.7156                                                                                                       | 0.082         | 0.0427 | 0.0667        | 0.0526        | 0.0404        |        |
|                                         | P-values:<br>probability of observed prediction on 10000 bootstrapped transcriptomes                         |               |        |               |               |               |        |
|                                         | ang                                                                                                          | brain         | eye    | gill          | phot          | skin          |        |
| Ue1_skin                                | 0.3901                                                                                                       | 0.792         | 0.4654 | 0.9117        | 0.8103        | <b>0.0036</b> |        |
| Ue1_phot                                | 0.2608                                                                                                       | 0.4612        | 0.9265 | 0.189         | <b>0.0447</b> | 0.8616        |        |
| Ue1_gill                                | 0.8792                                                                                                       | 0.9989        | 0.9861 | <b>0.0001</b> | 0.8241        | 0.2503        |        |
| Ue1_eye                                 | 0.9999                                                                                                       | 0.9999        | 0      | 0.9974        | 0.9915        | 0.9999        |        |
| Ue1_brain                               | 0.9999                                                                                                       | 0             | 0.9999 | 0.9998        | 0.997         | 0.9999        |        |
| Ue1_ang                                 | 0                                                                                                            | 0.9654        | 0.9482 | 0.5947        | 0.1024        | 0.8543        |        |
| Ue2_skin                                | 0.9658                                                                                                       | <b>0.0131</b> | 0.8246 | 0.9686        | 0.8619        | 0.3249        |        |
| Ue2_phot                                | 0.1933                                                                                                       | 0.869         | 0.8832 | 0.2894        | <b>0.0109</b> | 0.3926        |        |
| Ue2_gill                                | 0.762                                                                                                        | 0.981         | 0.959  | <b>0.0018</b> | 0.9922        | 0.0337        |        |
| Ue2_eye                                 | 0.9999                                                                                                       | 0.9999        | 0      | 0.9975        | 0.9999        | 0.9998        |        |
| Ue2_brain                               | 0.9999                                                                                                       | 0             | 0.9999 | 0.9989        | 0.9995        | 0.9999        |        |
| Ue2_ang                                 | 0                                                                                                            | 0.9993        | 0.9997 | 0.3648        | 0.5422        | 0.9827        |        |
| Ue3_skin                                | 0.7982                                                                                                       | 0.5761        | 0.5039 | 0.8966        | 0.2826        | <b>0.0109</b> |        |
| Ue3_phot                                | 0.1375                                                                                                       | 0.7691        | 0.9004 | 0.2536        | <b>0.0412</b> | 0.1057        |        |
| Ue3_gill                                | 0.6747                                                                                                       | 0.9982        | 0.9981 | <b>0.0001</b> | 0.8226        | 0.1399        |        |
| Ue3_eye                                 | 0.9979                                                                                                       | 0.9999        | 0      | 0.9807        | 0.9997        | 0.9937        |        |
| Ue3_brain                               | 0.9999                                                                                                       | 0             | 0.9999 | 0.9965        | 0.8709        | 0.9999        |        |
| Ue3_ang                                 | 0                                                                                                            | 0.9992        | 0.9999 | 0.4855        | 0.3341        | 0.4358        |        |

SI Table 4. Results of multinomial logistic regression test.

18 transcriptome libraries from each species were bootstrapped to generate 10000 'null transcriptomes'.

After the regression model was fit and cross-validated using *U. edulis*, the 18 real *E. scolopes* transcriptomes, and the 10000 null *E. scolopes* datasets were predicted under the model. The same approach was repeated to create a GLM of *Euprymna* transcriptomes and test the fit of real *Uroteuthis* data and generated null data.

Proportional support for each tissue category shown in top panels, and correspond to attached plots.

Exact p-values in lower tables represent the proportion of the null distributions in which larger predictions are observed.

P-values in red denote samples whose prediction score fell outside 95% of the null distribution for the tissue type.

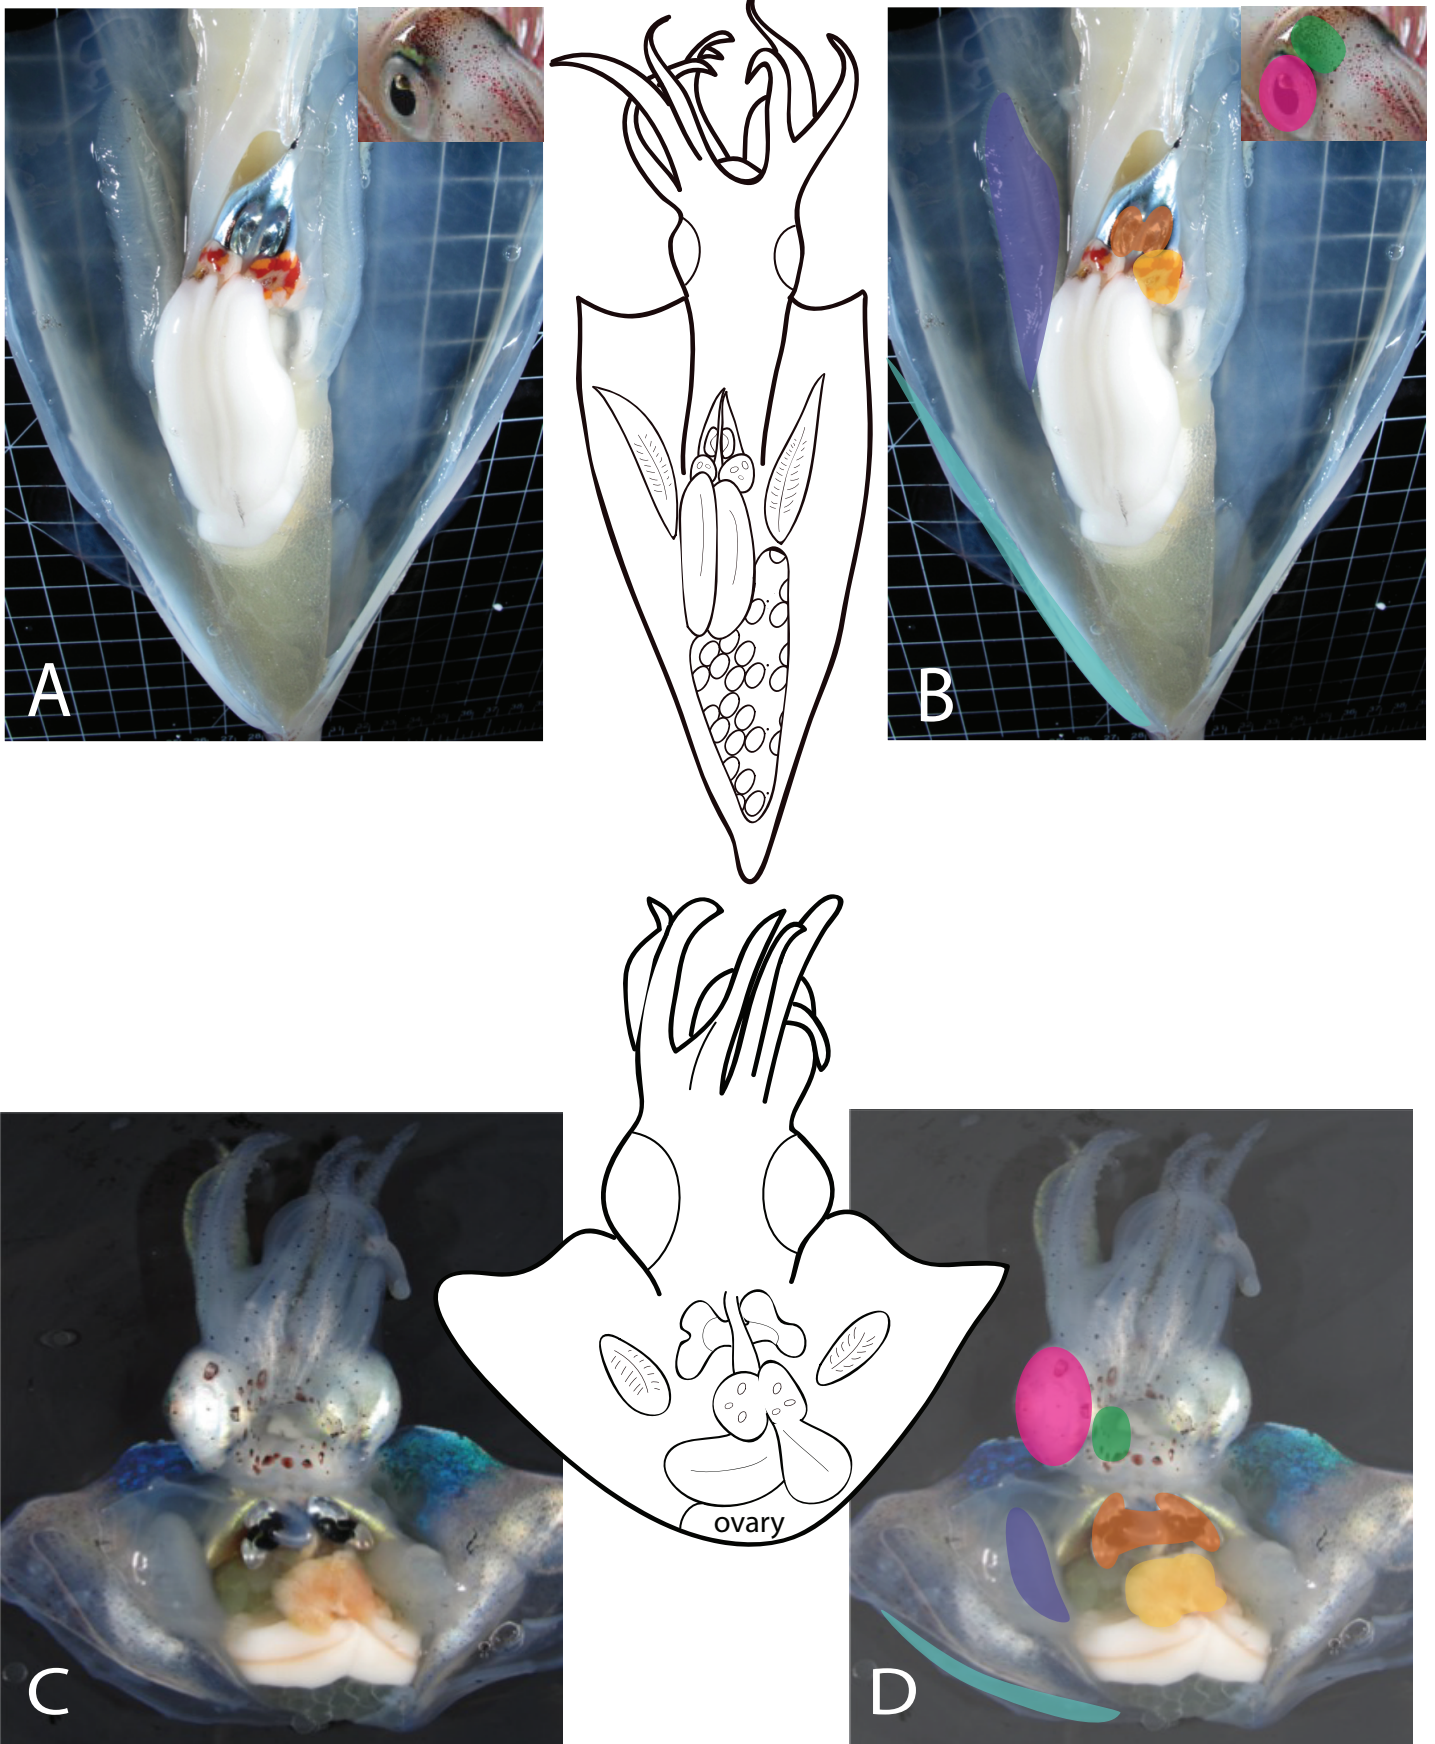

**Figure S1. *Uroteuthis* and *Euprymna* tissues.**

Ventral dissection of *Uroteuthis edulis* (top row A,B) and *Euprymna scolopes* (bottom row C, D) showing organs sampled for transcriptome analyses. Photophores shaded (in orange) in right panels (B,D), along with homologous organs: eyes (pink), brain (green), ANG (yellow), gill (purple), skin (blue). Cartoons display simplified anatomy.

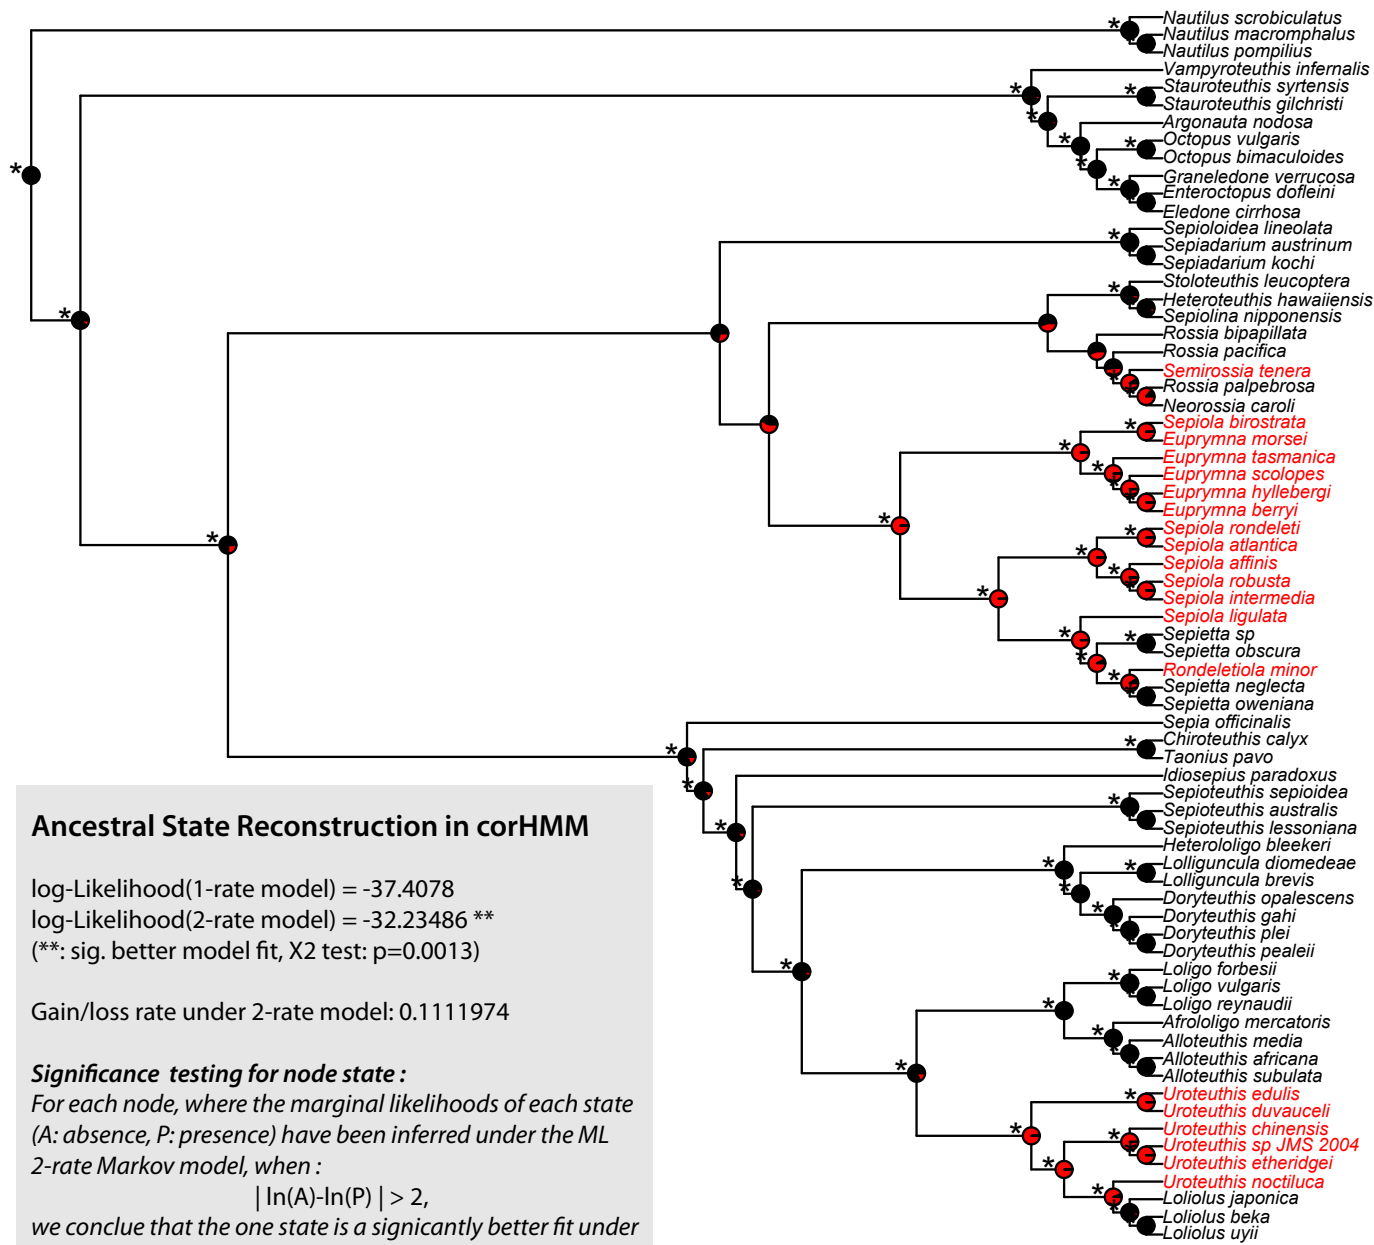

**Figure S2.** Marginal likelihoods for photophore presence (red) or absence (black) under 2-rate Markov model at ancestral nodes of ML topology. Nodes at which one state significantly improved the fit of the model over the other state are indicated by (\*).

Relative expression of genes expressed in photophores of *Euprymna* and *Uroteuthis*, by qPCR

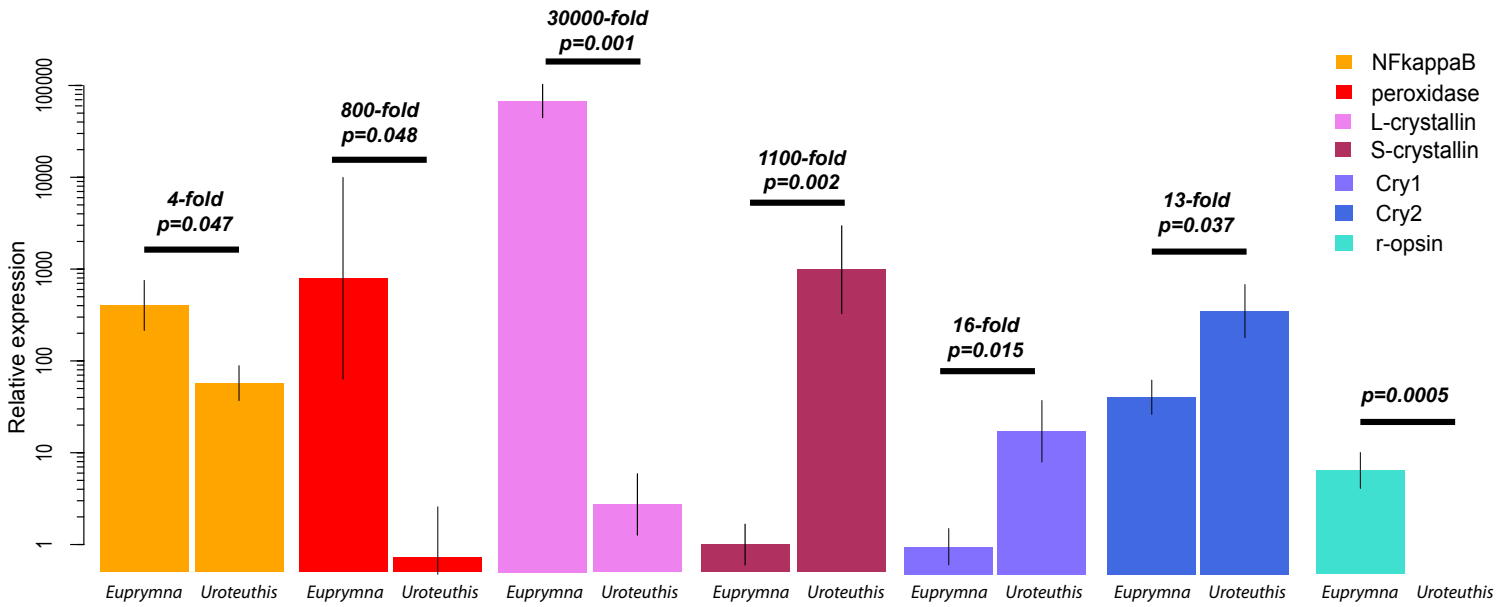

Transcript Abundances (FPKM) for select genes from transcriptome libraries of *Uroteuthis* and *Euprymna*

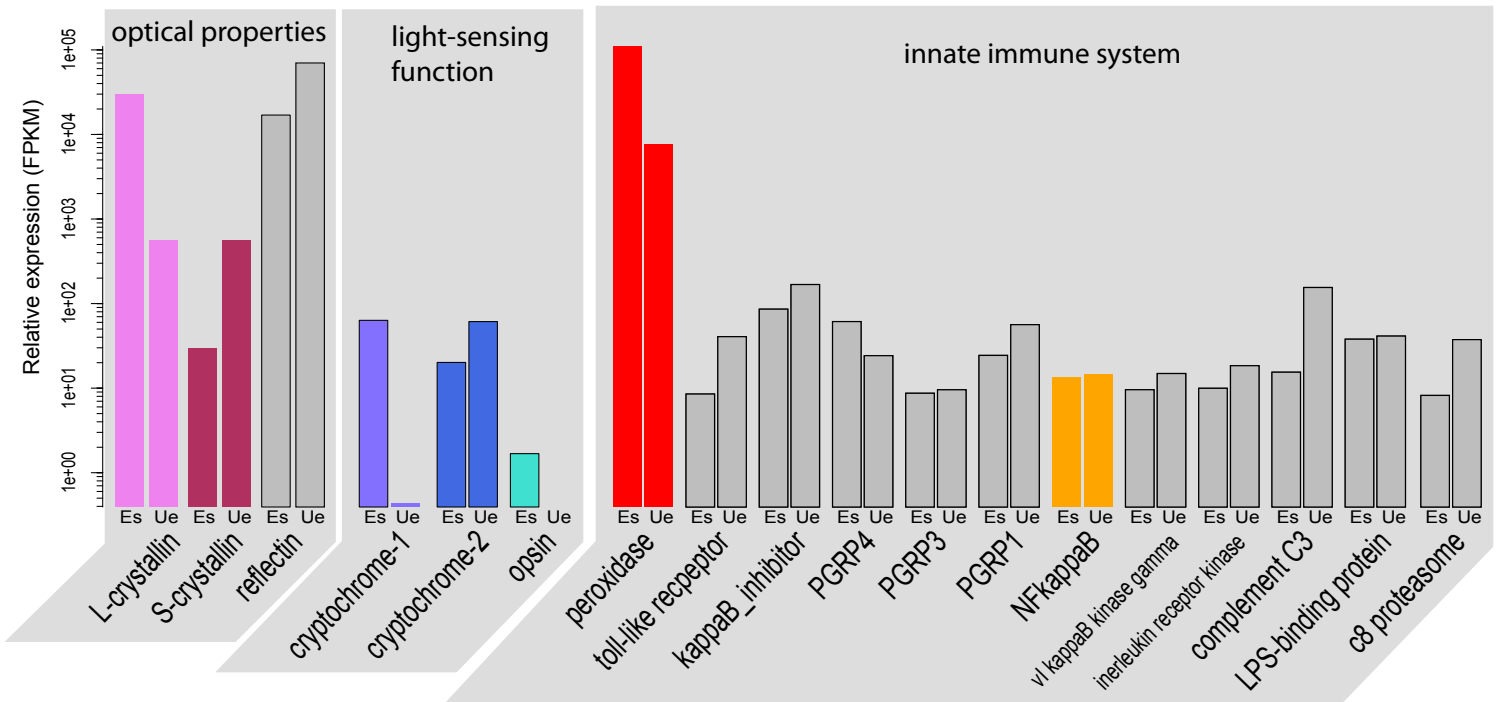

**Figure S3. Relative expression of genes expressed in photophores of *Euprymna* and *Uroteuthis*.**

Top panel: Mean expression levels for L-crystallin, S-crystallin, opsin, and peroxidase in qPCR assays, standardized by actin. Fold-abundance difference, S.E. bars and p-values from Wilcoxon Rank-sum test indicated.

Lower panel: Mean normalized transcript abundances (FPKM) for genes identified in photophore transcriptome libraries (each n=3). Genes grouped by putative functional categories. Only genes in color were assayed for expression differences via qPCR.

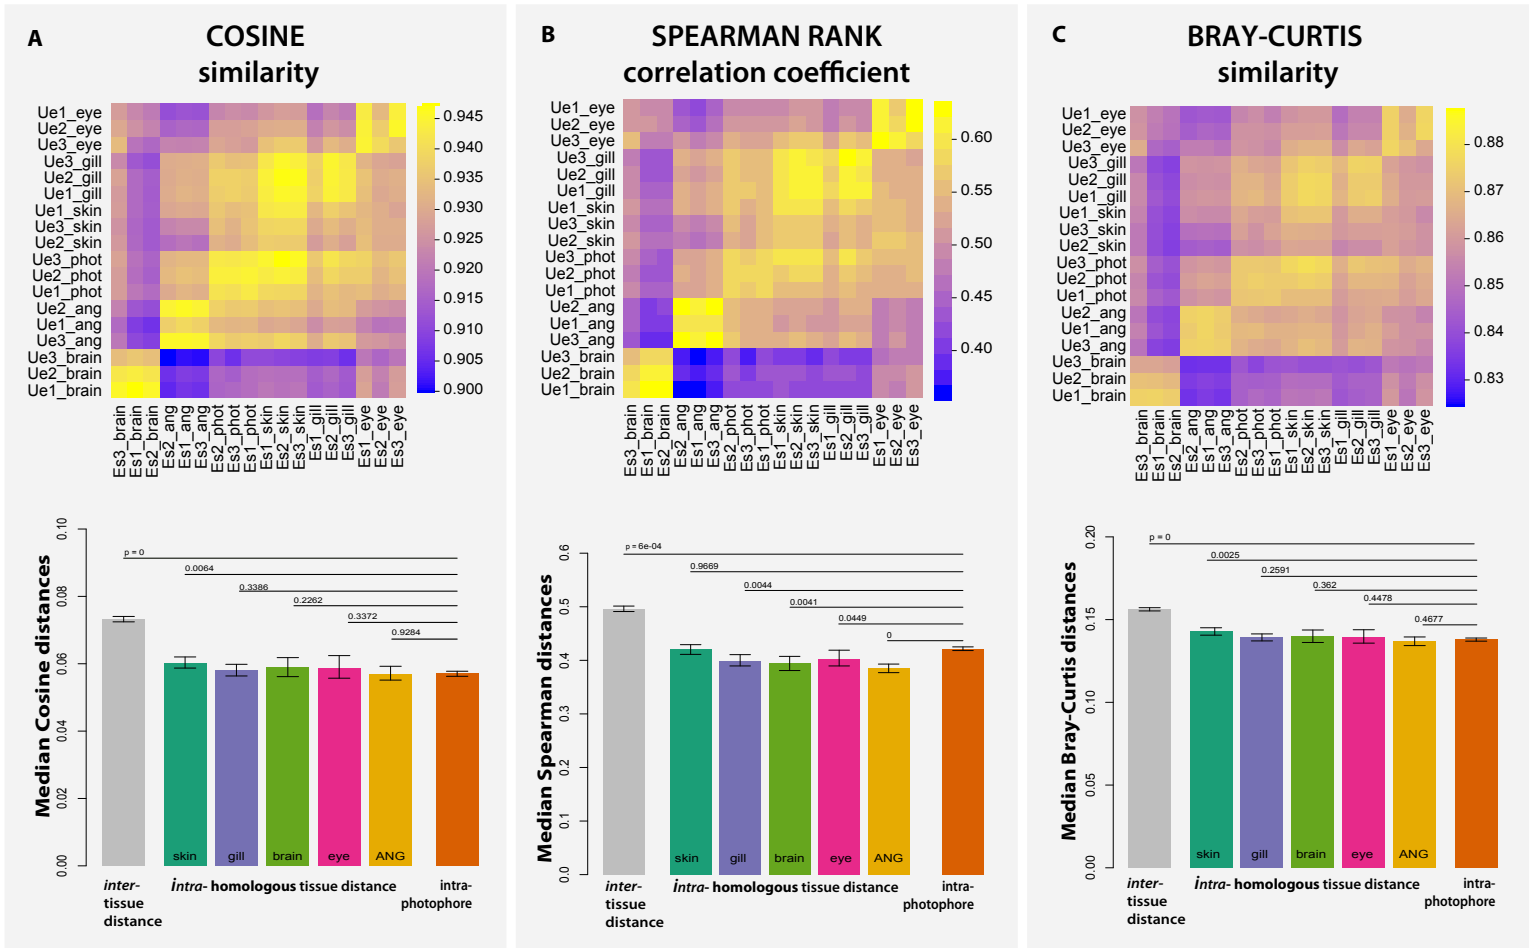

**Figure S4. Distances between transcriptomes as measured under (A) Cosine distance, (B) Spearman Rank distance, and (C) Bray-Curtis distance.** Upper panel heatmaps depict similarity between the 18 sequenced libraries from each species, ranging from most similar (yellow) to least similar (blue). Lower panel barplots depict the median dissimilarity measured between tissues. Under all 3 distance measures, photophores from Euprymna and Uroteuthis (orange) are less distant (more similar) to each other than expected given non-homologous tissues' distances (grey).



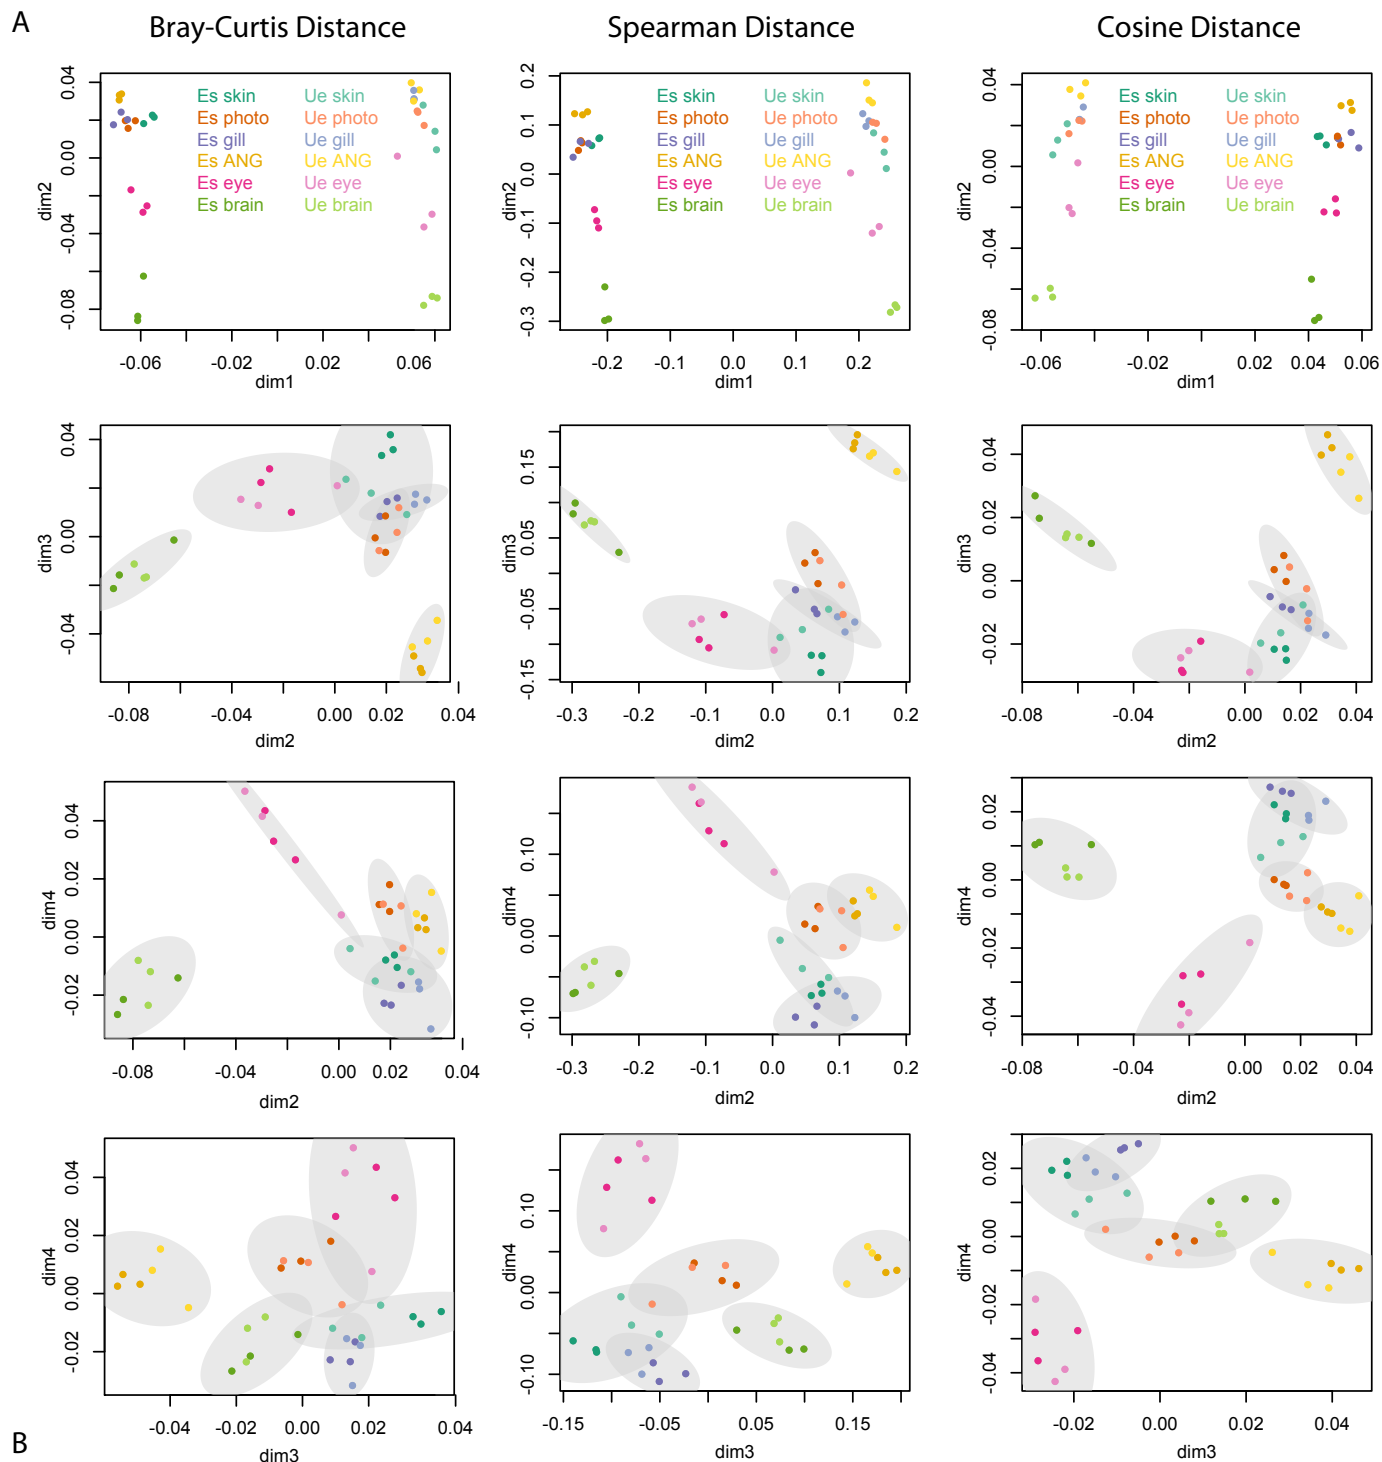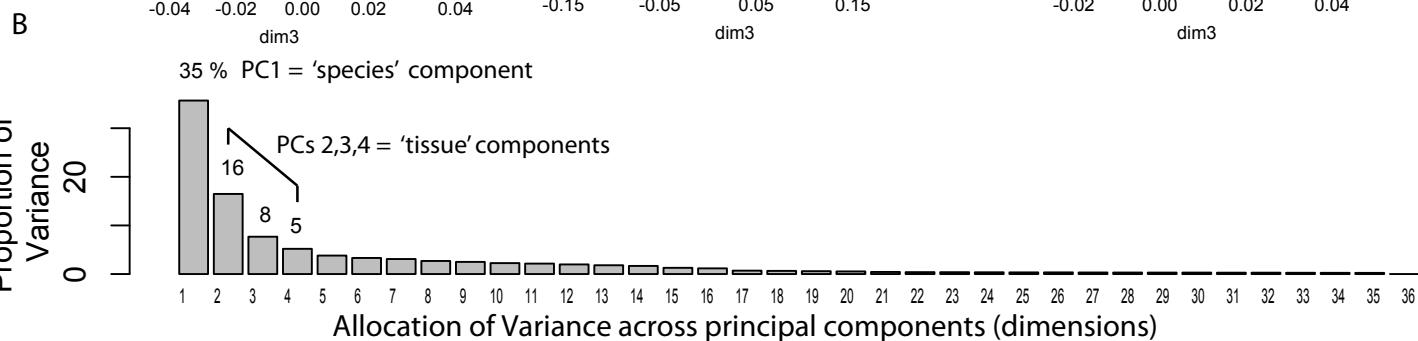

**Figure S5. Ordination of latent structure in transcriptomes distinguishes species and tissue signals.** A, Non-metric Multidimensional scaling of 36 transcriptomes (2 species, 6 tissues, 3 replicates each) using 3 different measure of distance. For each measure, dimensions 2, 3, and 4 capture variance in gene expression which are shared between tissue type in both species. Dimension 1 capture variance explained by species differences. B, Scree plot showing proportion of variance in the 36-transcriptome dataset captured by each dimension (principal component). Gene expression differences due to species (Dimension 1) accounts for the largest proportion of variation while tissue (additively dimensions 2, 3, 4) accounts nearly the same proportion.

**Figure S 6A.** *Uroteuthis* transcriptomes tested against *Euprymna* GLM

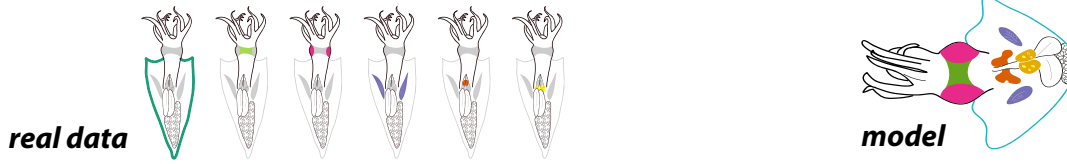

Transcriptome data from *Uroteuthis* (18 samples; 3 from each tissue type) were predicted under a GLM fitted by 18 *Euprymna* transcriptomes from corresponding tissues. Circles denote the prediction scores for each of the 18 *Uroteuthis* transcriptomes. Filled points represent scores which fell outside of 95% of the null distribution. Null distributions for the prediction scores for each tissue type were generated by testing 10000 bootstrapped *Uroteuthis* libraries against the same *Euprymna* model.

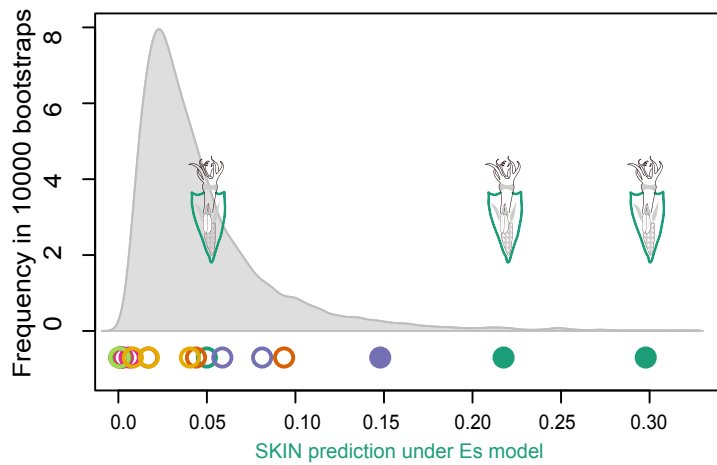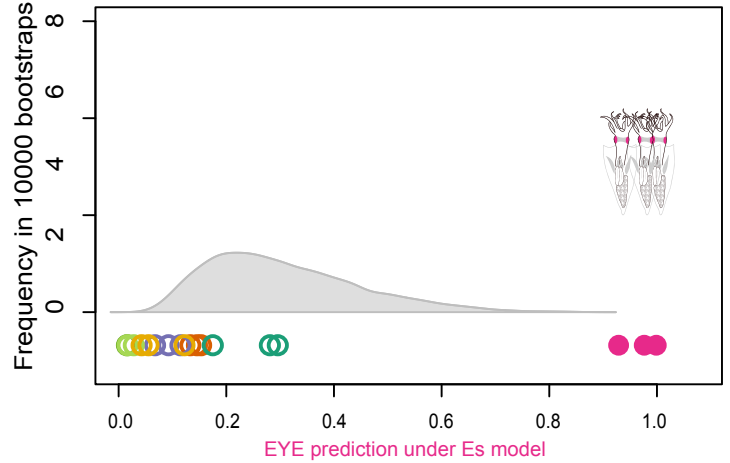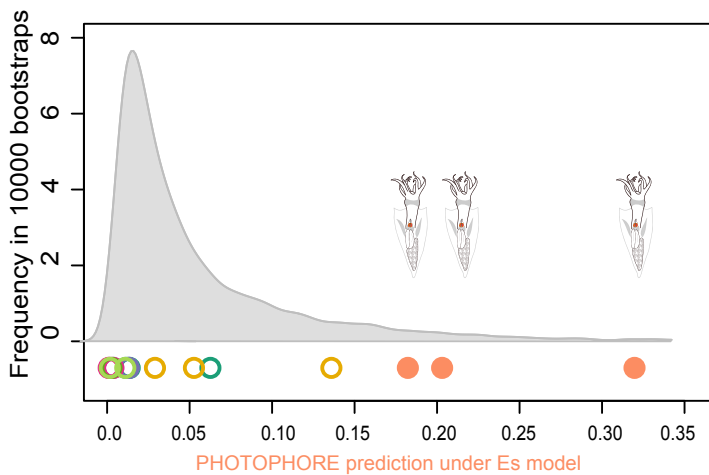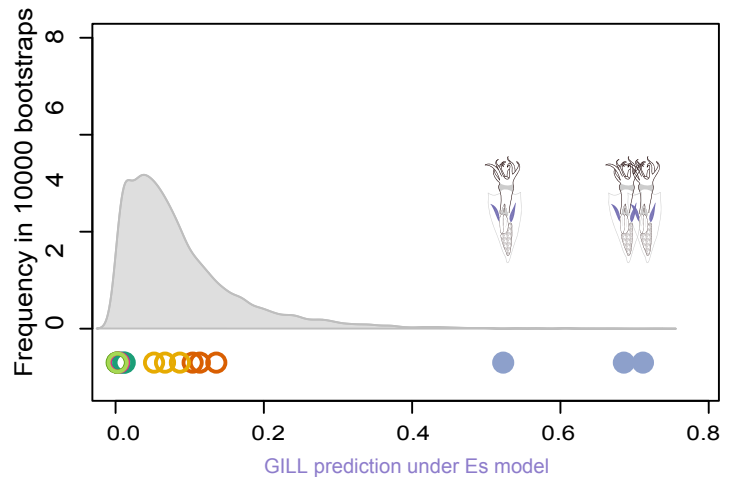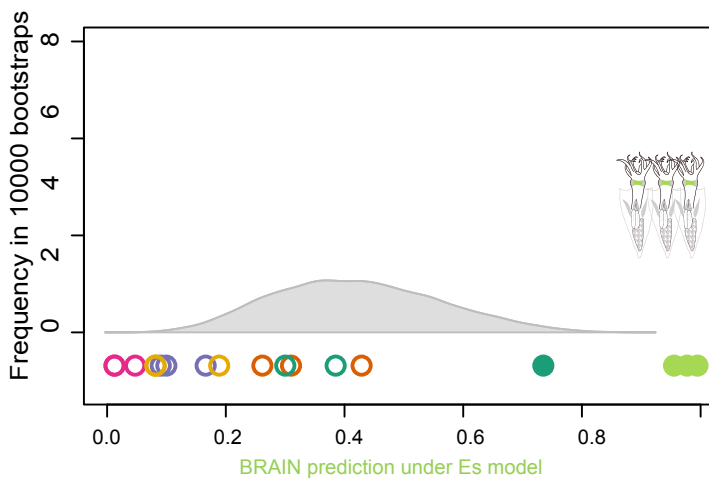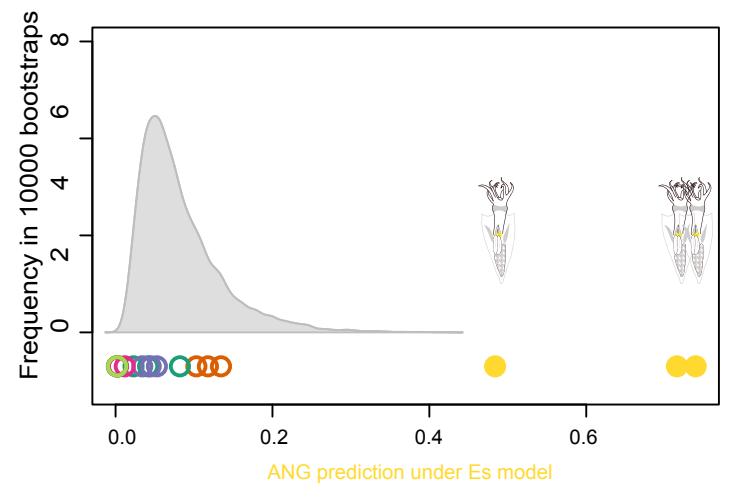

**Figure S 6B.** *Euprymna* transcriptomes tested against *Uroteuthis* GLM

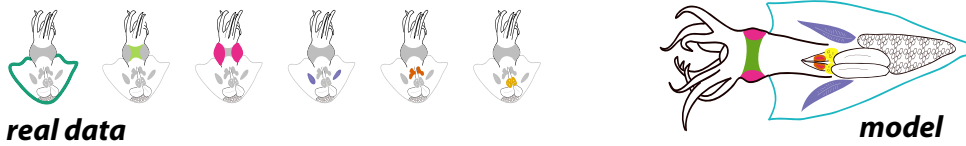

Transcriptome data from *Euprymna* (18 samples; 3 from each tissue type) were predicted under a GLM fitted by 18 *Uroteuthis* transcriptomes from corresponding tissues. Circles denote the prediction scores for each of the 18 *Euprymna* transcriptomes. Filled points represent scores which fell outside of 95% of the null distribution. Null distributions for the prediction scores for each tissue type were generated by testing 10000 bootstrapped *Euprymna* libraries against the same *Uroteuthis* model.

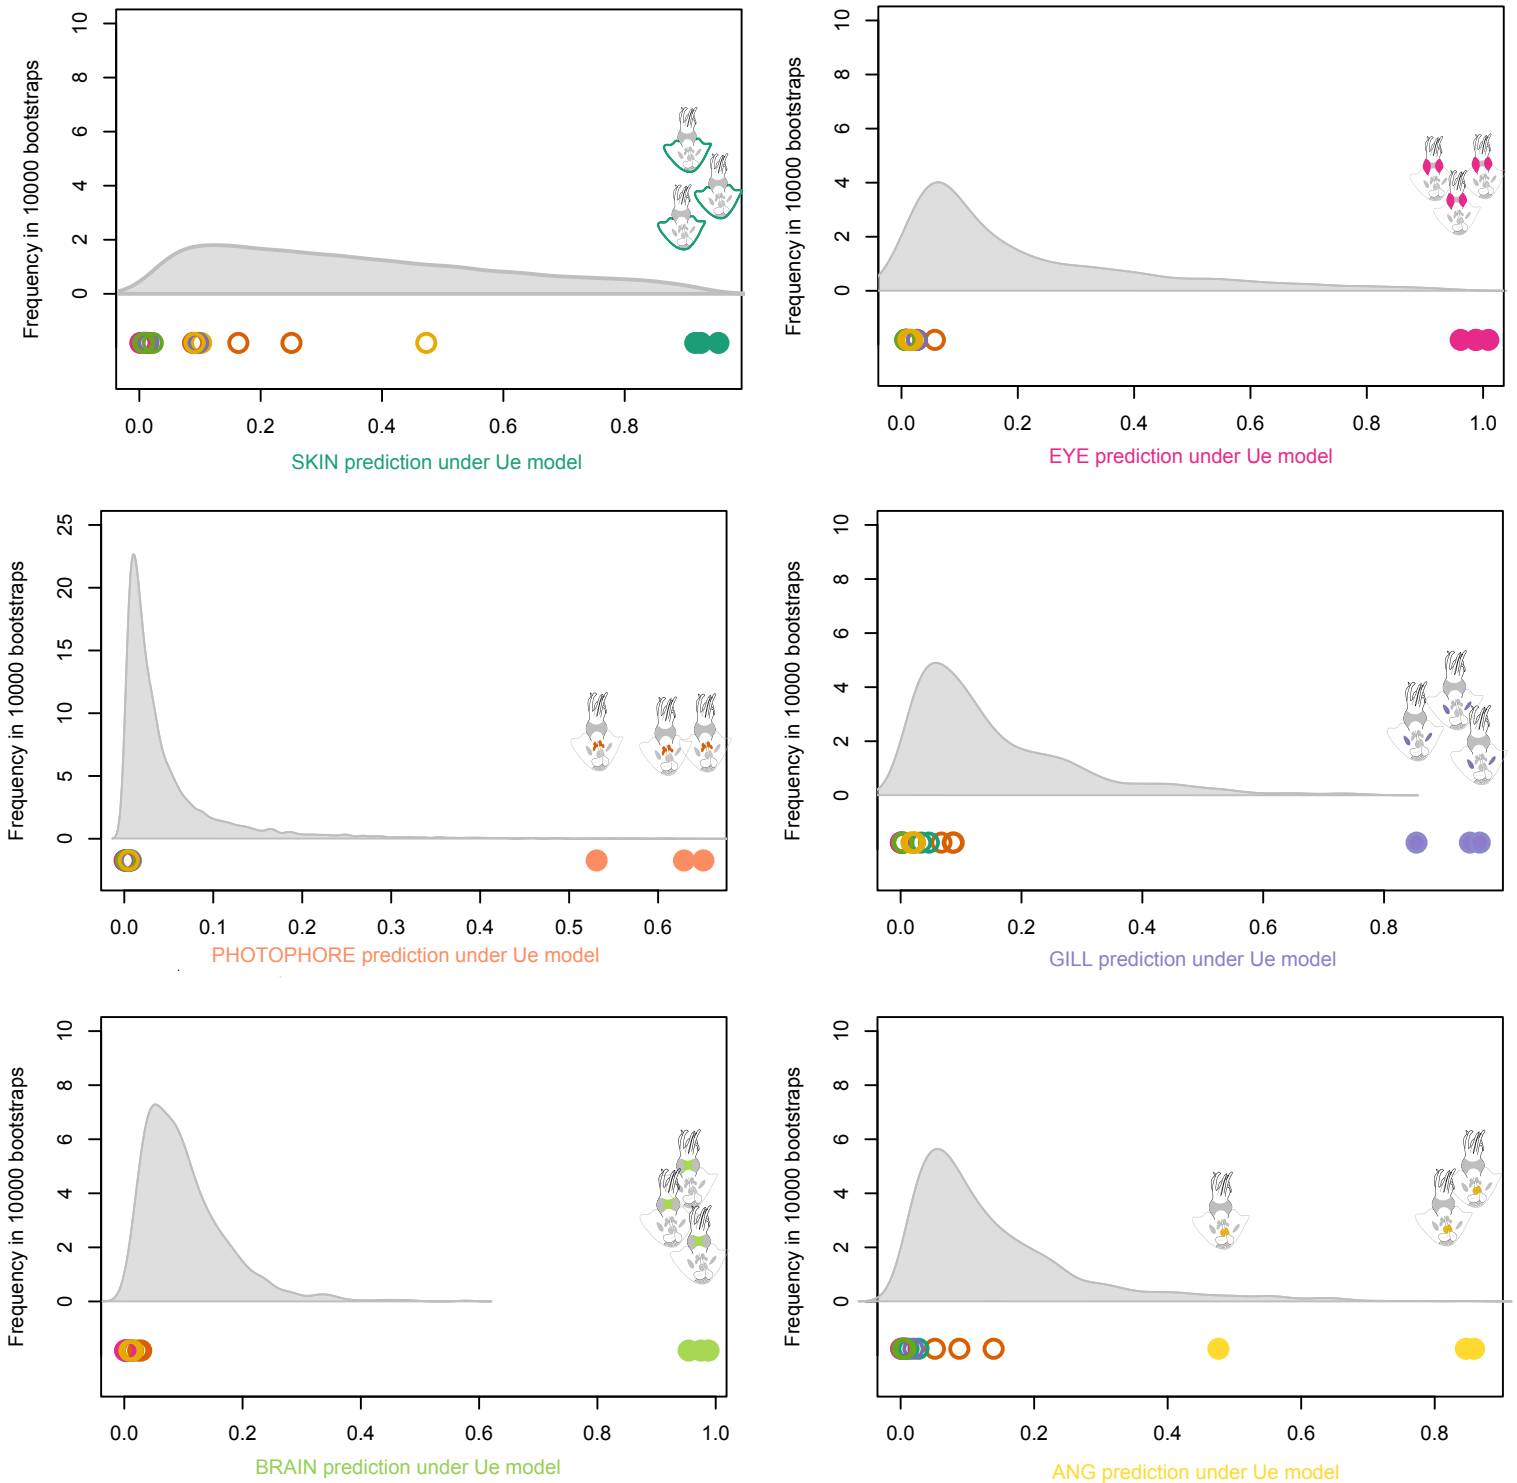

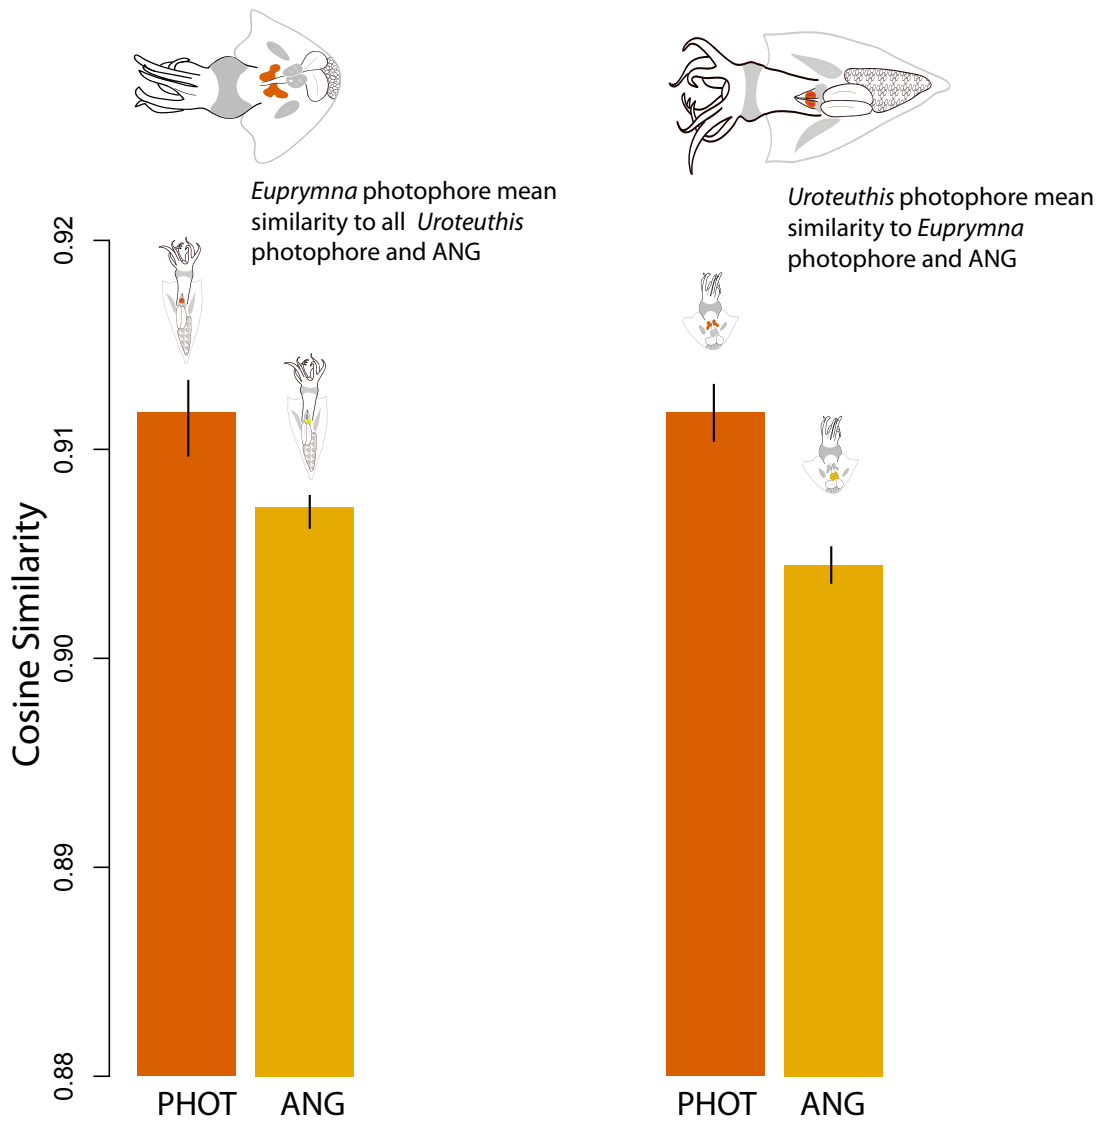

**Figure S 7.** Photophore transcriptomes share greater similarity with other photophores than photophores do with accessory nidamental glands. Bars represent mean cosine similarities between photophores or between photophores and ANGs. Error bars depict 95% confidence intervals estimated by 500 bootstrap replicates.
